# Supplementary material for: Isolation, Synthesis and Absolute Configuration of the Pericharaxins A and B, Epimeric Hydroxy-Polyene Glycerol Ethers from the Calcarean Sponge Pericharax heteroraphis
Source: MDPI journal article supplement (doi:10.3390/md20100635), 2022-10-11

# Supporting Information

## Table of Contents

|                                                                                                                                                                                              |    |
|----------------------------------------------------------------------------------------------------------------------------------------------------------------------------------------------|----|
| <b>Figure S1:</b> UV chromatogram of fraction F2 containing pericharaxins A and B ( <b>1a</b> + <b>1b</b> ).....                                                                             | 4  |
| <b>Table S1:</b> <sup>1</sup> H NMR Data of ( <i>S</i> )- and ( <i>R</i> )-MTPA-triesters and shifts comparison (500 MHz, CDCl <sub>3</sub> ). ..                                            | 5  |
| <b>Figure S2:</b> Representation of the conformation of each MTPA esters and the resulting $\Delta^{SR}$ values (in ppm) for each of the protons.....                                        | 5  |
| <b>Table S2:</b> <sup>13</sup> C NMR Data in $\delta$ ppm of natural and synthetic compounds <b>1a</b> + <b>1b</b> and compound <b>17a</b> + <b>17b</b> (125 MHz, CDCl <sub>3</sub> ). ..... | 6  |
| <b>Figure S3:</b> <sup>1</sup> H NMR spectrum of natural pericharaxins A + B ( <b>1a</b> + <b>1b</b> ) (500 MHz, CDCl <sub>3</sub> ).....                                                    | 7  |
| <b>Figure S4:</b> <sup>13</sup> C NMR spectrum of natural pericharaxin A + B ( <b>1a</b> + <b>1b</b> ) (125 MHz, CDCl <sub>3</sub> ).....                                                    | 7  |
| <b>Figure S5:</b> <sup>1</sup> H NMR spectrum of synthetic pericharaxins A + B ( <b>1a</b> + <b>1b</b> ) (500 MHz, CDCl <sub>3</sub> ).....                                                  | 8  |
| <b>Figure S6:</b> <sup>13</sup> C NMR spectrum of synthetic pericharaxins A + B ( <b>1a</b> + <b>1b</b> ) (125 MHz, CDCl <sub>3</sub> ).....                                                 | 8  |
| <b>Figure S7:</b> <sup>1</sup> H NMR spectrum of synthetic pericharaxin ( <b>1a</b> ) (500 MHz, CDCl <sub>3</sub> ).....                                                                     | 9  |
| <b>Figure S8:</b> <sup>13</sup> C NMR spectrum of synthetic pericharaxin ( <b>1a</b> ) (125 MHz, CDCl <sub>3</sub> ).....                                                                    | 9  |
| <b>Figure S9:</b> <sup>1</sup> H NMR spectrum of synthetic pericharaxin ( <b>1b</b> ) (500 MHz, CDCl <sub>3</sub> ). .....                                                                   | 10 |
| <b>Figure S10:</b> <sup>13</sup> C NMR spectrum of synthetic pericharaxin ( <b>1b</b> ) (125 MHz, CDCl <sub>3</sub> ).....                                                                   | 10 |
| <b>Figure S11:</b> Chiral HPLC chromatograms of natural and synthetic compounds comparison.....                                                                                              | 11 |
| <b>Figure S12:</b> <sup>1</sup> H NMR spectrum of compound <b>4</b> (500 MHz, CDCl <sub>3</sub> ).....                                                                                       | 12 |
| <b>Figure S13:</b> <sup>13</sup> C NMR spectrum of compound <b>4</b> (125 MHz, CDCl <sub>3</sub> ).....                                                                                      | 12 |
| <b>Figure S14:</b> <sup>1</sup> H NMR spectrum of compound <b>5</b> (500 MHz, CDCl <sub>3</sub> ).....                                                                                       | 13 |
| <b>Figure S15:</b> <sup>1</sup> H NMR spectrum of compound <b>6</b> (500 MHz, CDCl <sub>3</sub> ).....                                                                                       | 14 |
| <b>Figure S16:</b> <sup>13</sup> C NMR spectrum of compound <b>6</b> (125 MHz, CDCl <sub>3</sub> ).....                                                                                      | 14 |
| <b>Figure S17:</b> <sup>1</sup> H NMR spectrum of compound <b>7</b> (500 MHz, CDCl <sub>3</sub> ).....                                                                                       | 15 |
| <b>Figure S18:</b> <sup>13</sup> C NMR spectrum of compound <b>7</b> (125 MHz, CDCl <sub>3</sub> ).....                                                                                      | 15 |
| <b>Figure S19:</b> <sup>1</sup> H NMR spectrum of compound <b>11</b> (300 MHz, CDCl <sub>3</sub> ).....                                                                                      | 16 |
| <b>Figure S20:</b> <sup>13</sup> C NMR spectrum of compound <b>11</b> (75 MHz, CDCl <sub>3</sub> ).....                                                                                      | 16 |
| <b>Figure S21:</b> <sup>1</sup> H NMR spectrum of compound <b>12</b> (500 MHz, CDCl <sub>3</sub> ).....                                                                                      | 17 |
| <b>Figure S22:</b> <sup>13</sup> C NMR spectrum of compound <b>12</b> (125 MHz, CDCl <sub>3</sub> ).....                                                                                     | 17 |
| <b>Figure S23:</b> <sup>1</sup> H NMR spectrum of compound <b>13</b> (300 MHz, CDCl <sub>3</sub> ).....                                                                                      | 18 |
| <b>Figure S24:</b> <sup>13</sup> C NMR spectrum of compound <b>13</b> (75 MHz, CDCl <sub>3</sub> ).....                                                                                      | 18 |
| <b>Figure S25:</b> <sup>1</sup> H NMR spectrum of compound <b>14'</b> (500 MHz, CDCl <sub>3</sub> ).....                                                                                     | 19 |
| <b>Figure S26:</b> <sup>1</sup> H NMR spectrum of compound <b>14'</b> (125 MHz, CDCl <sub>3</sub> ).....                                                                                     | 19 |
| <b>Figure S27:</b> <sup>1</sup> H NMR spectrum of compound <b>14</b> (500 MHz, CDCl <sub>3</sub> ).....                                                                                      | 20 |

|                                                                                                                                                                                                                                                                                                                                                                                                                         |    |
|-------------------------------------------------------------------------------------------------------------------------------------------------------------------------------------------------------------------------------------------------------------------------------------------------------------------------------------------------------------------------------------------------------------------------|----|
| <b>Figure S28:</b> $^{13}\text{C}$ NMR spectrum of compound <b>14</b> (125 MHz, $\text{CDCl}_3$ ).....                                                                                                                                                                                                                                                                                                                  | 20 |
| <b>Figure S29:</b> NMR comparisons of natural product with the two synthetic products .....                                                                                                                                                                                                                                                                                                                             | 21 |
| <b>Figure S30:</b> $^{13}\text{C}$ NMR comparison of epimers <b>1a</b> ( <i>S,R</i> ) and <b>1b</b> ( <i>S,S</i> ).....                                                                                                                                                                                                                                                                                                 | 22 |
| <b>Figure S31:</b> results of the assessment of an ATDC5-based rapid screening platform using the human Col X (hCol X) proximal promoter activity for selection of natural compounds able to stimulate endochondral differentiation. hColX-promoter activity in murine ATDC5 chondrocyte line cultured under endochondral differentiation conditions as assessed by measurement of luminometric luciferase signals..... | 22 |

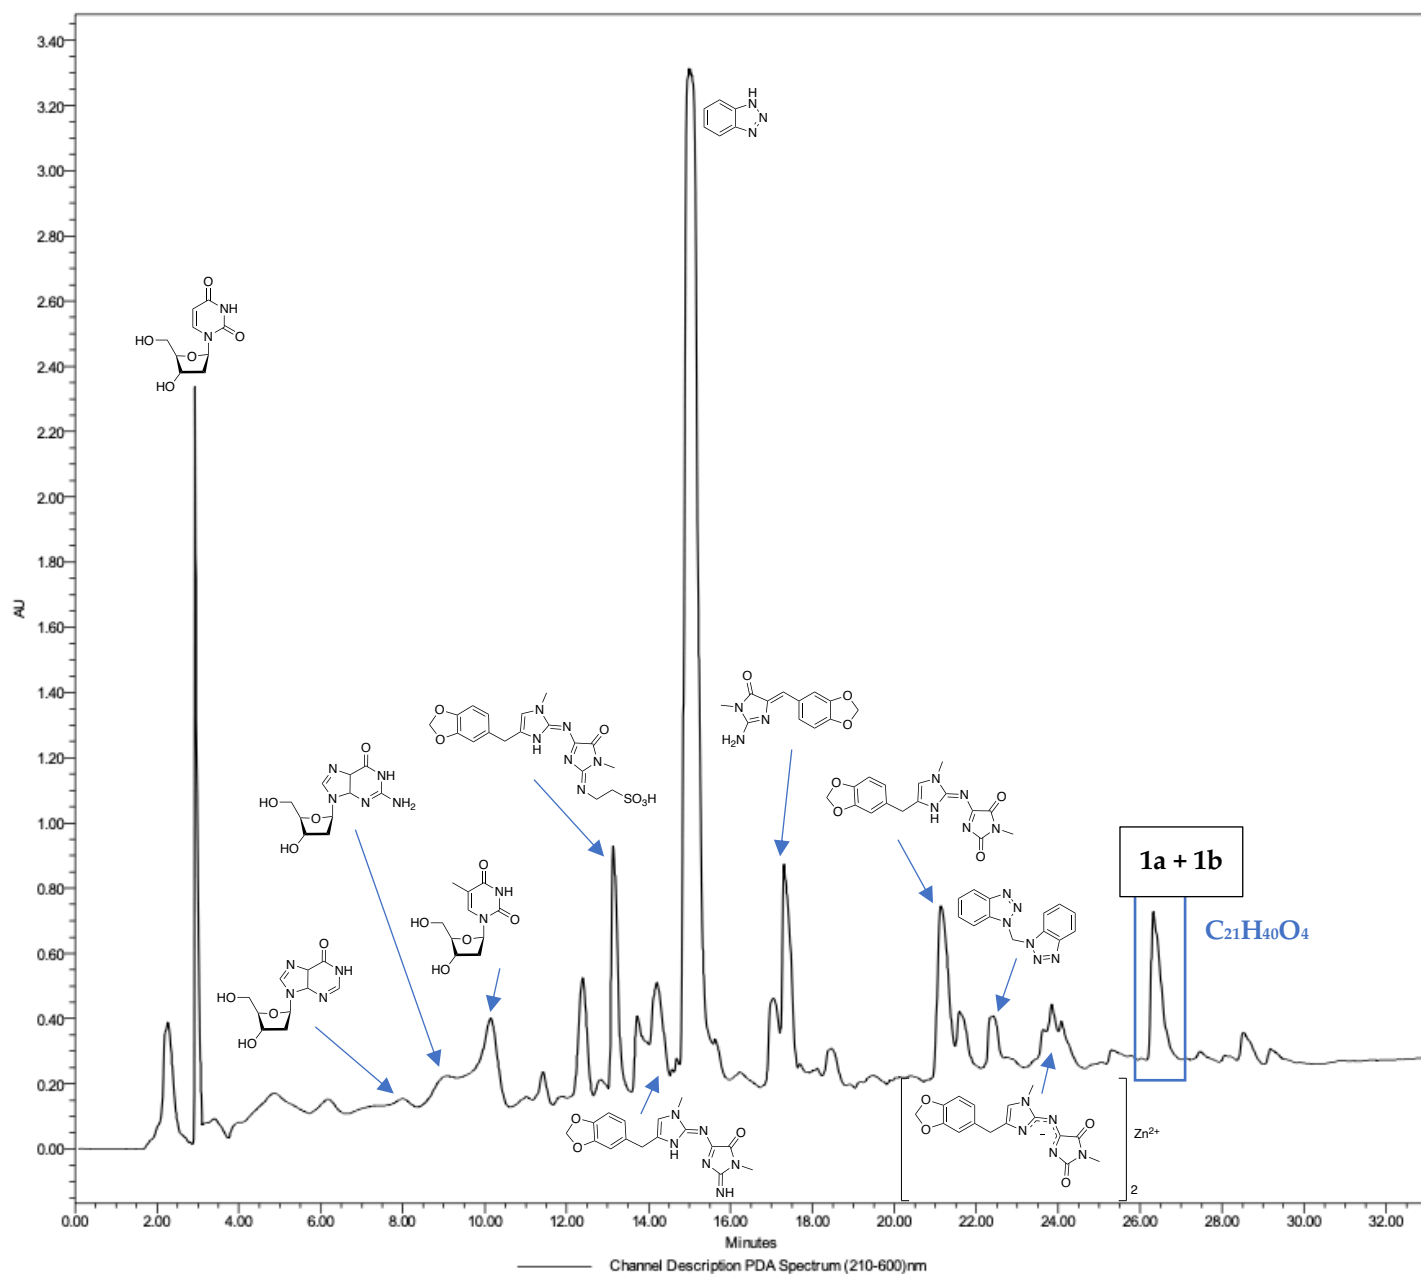

**Figure S1:** UV chromatogram of fraction F2 containing pericharaxins A and B (**1a + 1b**)

**Table S1.** <sup>1</sup>H NMR Data of (*S*)- and (*R*)-MTPA-triesters and shifts comparison (500 MHz, CDCl<sub>3</sub>).

| N°    | S-MTPA-triester ( <b>18</b> ) | R-MTPA-triester ( <b>19</b> ) | $\Delta^{SR}$ |
|-------|-------------------------------|-------------------------------|---------------|
|       | $\delta_H$ (ppm)              | $\delta_H$ (ppm)              |               |
| 1     | 3,33                          | 3,27                          | 0,06          |
| 2     | 1,45                          | 1,44                          | 0,01          |
| 3     | 1,26                          | 1,32                          | -0,06         |
| 4     | 1,59                          | 1,62                          | -0,03         |
| 5     | 1,68                          | 1,72                          | -0,04         |
| 6     | 5,52                          | 5,49                          | 0,03          |
| 7     | 5,59                          | 5,50                          | 0,09          |
| 8     | 6,62                          | 6,54                          | 0,08          |
| 9     | 5,95                          | 5,89                          | 0,06          |
| 10    | 5,53                          | 5,49                          | 0,04          |
| 11    | 2,16                          | 2,12                          | 0,04          |
| 12    | 1,36                          | 1,32                          | 0,04          |
| 13-17 | 1,26                          | 1,26                          | 0             |
| 18    | 0,88                          | 0,88                          | 0             |
| 3'a   | 4,62                          | 4,70                          | -0,08         |
| 3'b   | 4,35                          | 4,41                          | -0,06         |
| 2'    | 5,46                          | 5,42                          | 0,04          |
| 1     | 3,57                          | 3,46                          | 0,11          |
| OMe   | 3,54/3,59/3,43                | 3,52/3,46/3,38                |               |

**Figure S2:** Representation of the conformation of each MTPA esters and the resulting  $\Delta^{SR}$  values (in ppm) for each of the protons.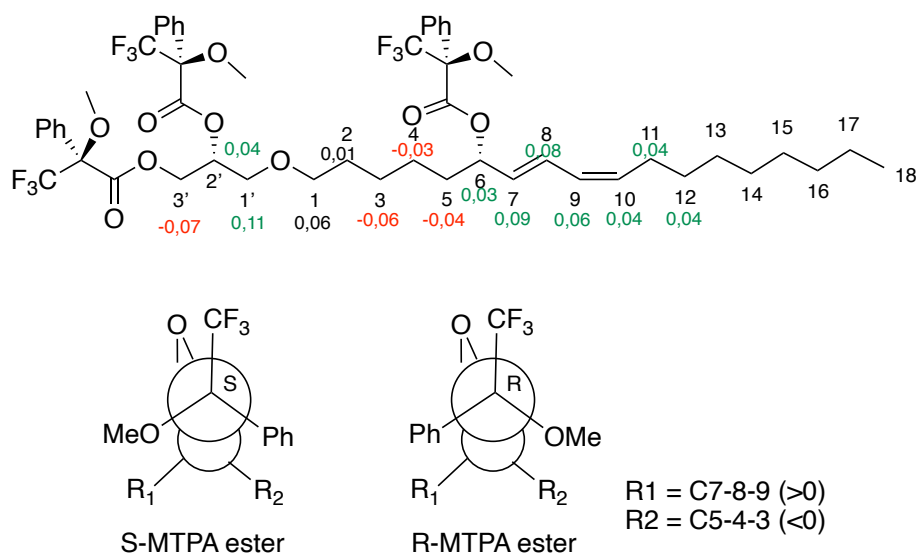

**Table S2.**  $^{13}\text{C}$  NMR Data in  $\delta$ ppm of natural and synthetic Compound **1a + 1b** and compound **17a + 17b** (125 MHz,  $\text{CDCl}_3$ ).

| N° | Natural compounds                     | Synthetic compounds                   | Synthetic compounds                   |
|----|---------------------------------------|---------------------------------------|---------------------------------------|
|    | <b>1a + 1b</b>                        | <b>1a + 1b</b>                        | <b>17a + 17b</b>                      |
| 1  | 71.9, $\text{CH}_2$                   | 71.8, $\text{CH}_2$                   | 71.6, $\text{CH}_2$                   |
| 2  | 29.4, $\text{CH}_2$                   | 29.5, $\text{CH}_2$                   | 29.8, $\text{CH}_2$                   |
| 3  | <b>26.1, <math>\text{CH}_2</math></b> | <b>26.2, <math>\text{CH}_2</math></b> | <b>22.1, <math>\text{CH}_2</math></b> |
| 4  | <b>25.3, <math>\text{CH}_2</math></b> | <b>25.3, <math>\text{CH}_2</math></b> | 37.0, $\text{CH}_2$                   |
| 5  | 37.4, $\text{CH}_2$                   | 37.3, $\text{CH}_2$                   | 72.8, CH                              |
| 6  | 73.1, CH                              | 72.9, CH                              | 135.6, CH                             |
| 7  | 136.0, CH                             | 135.7, CH                             | 126.2, CH                             |
| 8  | 125.9, CH                             | 126.1, CH                             | 127.7, CH                             |
| 9  | 127.9, CH                             | 127.7, CH                             | 133.4, CH                             |
| 10 | 133.4, CH                             | 133.3, CH                             | 27.9, $\text{CH}_2$                   |
| 11 | 27.8, $\text{CH}_2$                   | 27.9, $\text{CH}_2$                   | 29.7, $\text{CH}_2$                   |
| 12 | 29.3, $\text{CH}_2$                   | 29.4, $\text{CH}_2$                   | 29.6, $\text{CH}_2$                   |
| 13 | 29.7, $\text{CH}_2$                   | 29.8, $\text{CH}_2$                   | 29.5, $\text{CH}_2$                   |
| 14 | 29.6, $\text{CH}_2$                   | 29.6, $\text{CH}_2$                   | 29.4, $\text{CH}_2$                   |
| 15 | 29.1, $\text{CH}_2$                   | 29.2, $\text{CH}_2$                   | 29.4, $\text{CH}_2$                   |
| 16 | 31.9, $\text{CH}_2$                   | 32.0, $\text{CH}_2$                   | 32.0, $\text{CH}_2$                   |
| 17 | 22.7, $\text{CH}_2$                   | 22.8, $\text{CH}_2$                   | 22.8, $\text{CH}_2$                   |
| 18 | 14.2, $\text{CH}_3$                   | 14.2, $\text{CH}_3$                   | 14.2, $\text{CH}_3$                   |
| 1' | 72.7, $\text{CH}_2$                   | 72.6, $\text{CH}_2$                   | 72.6, $\text{CH}_2$                   |
| 2' | 70.6, CH                              | 70.6, CH                              | 70.6, CH                              |
| 3' | 64.4, $\text{CH}_2$                   | 64.4, $\text{CH}_2$                   | 64.3, $\text{CH}_2$                   |

**Figure S3:**  $^1\text{H}$  NMR spectrum of natural pericharaxins A + B (**1a** + **1b**) (500 MHz,  $\text{CDCl}_3$ ).

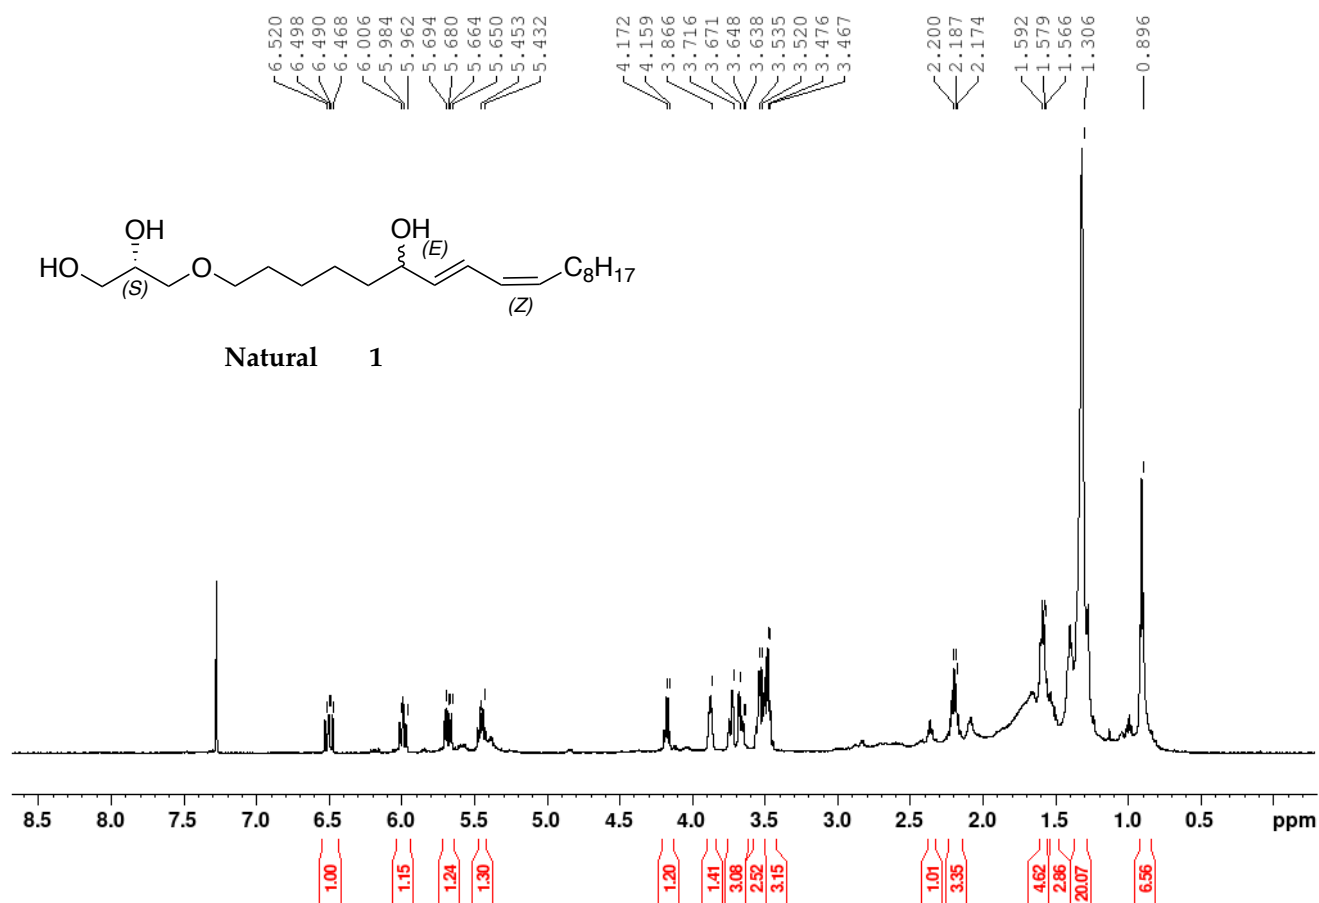

**Figure S4:**  $^{13}\text{C}$  NMR spectrum of natural pericharaxin A + B (**1a** + **1b**) (125 MHz,  $\text{CDCl}_3$ ).

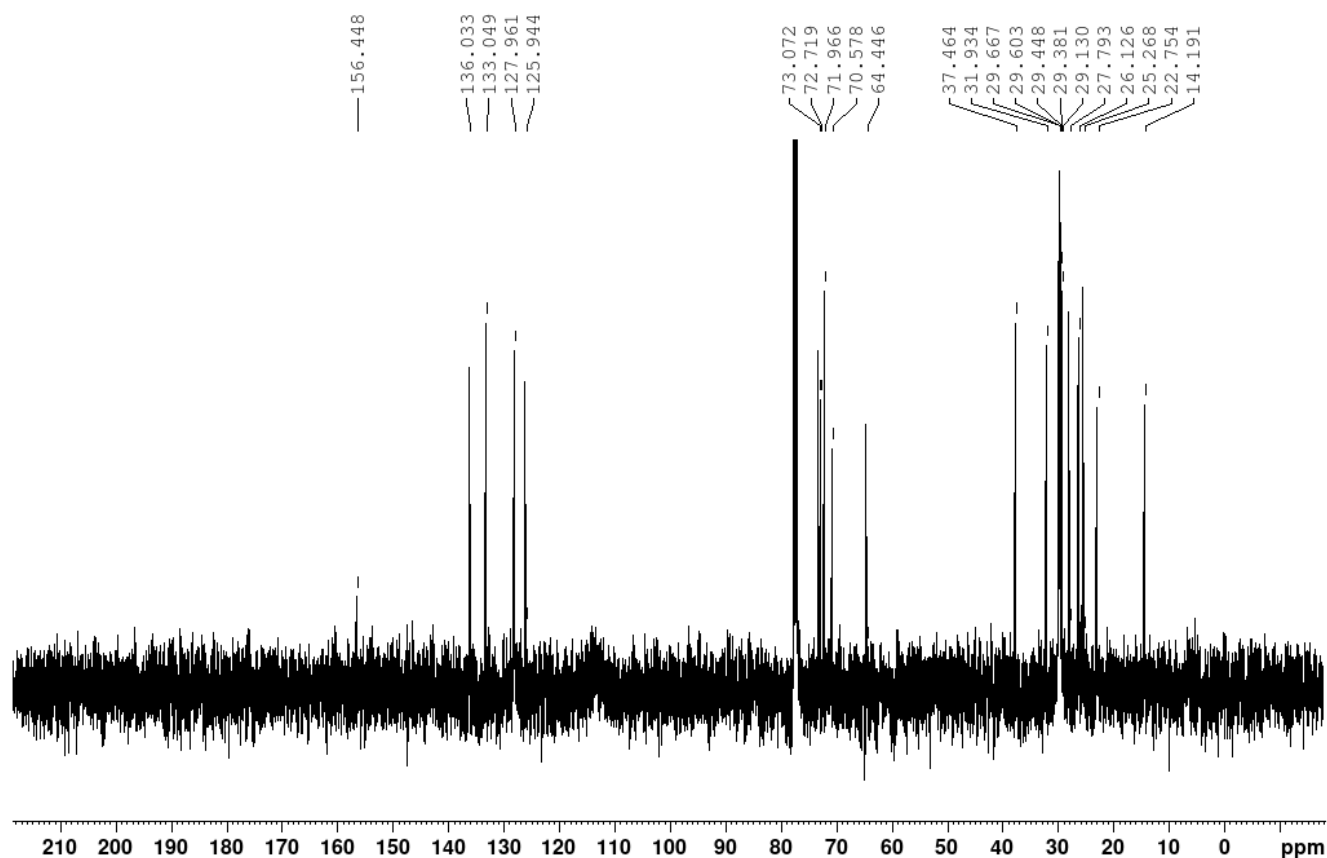

Figure S5:  $^1\text{H}$  NMR spectrum of synthetic pericharaxins A + B (**1a** + **1b**) (500 MHz,  $\text{CDCl}_3$ ).

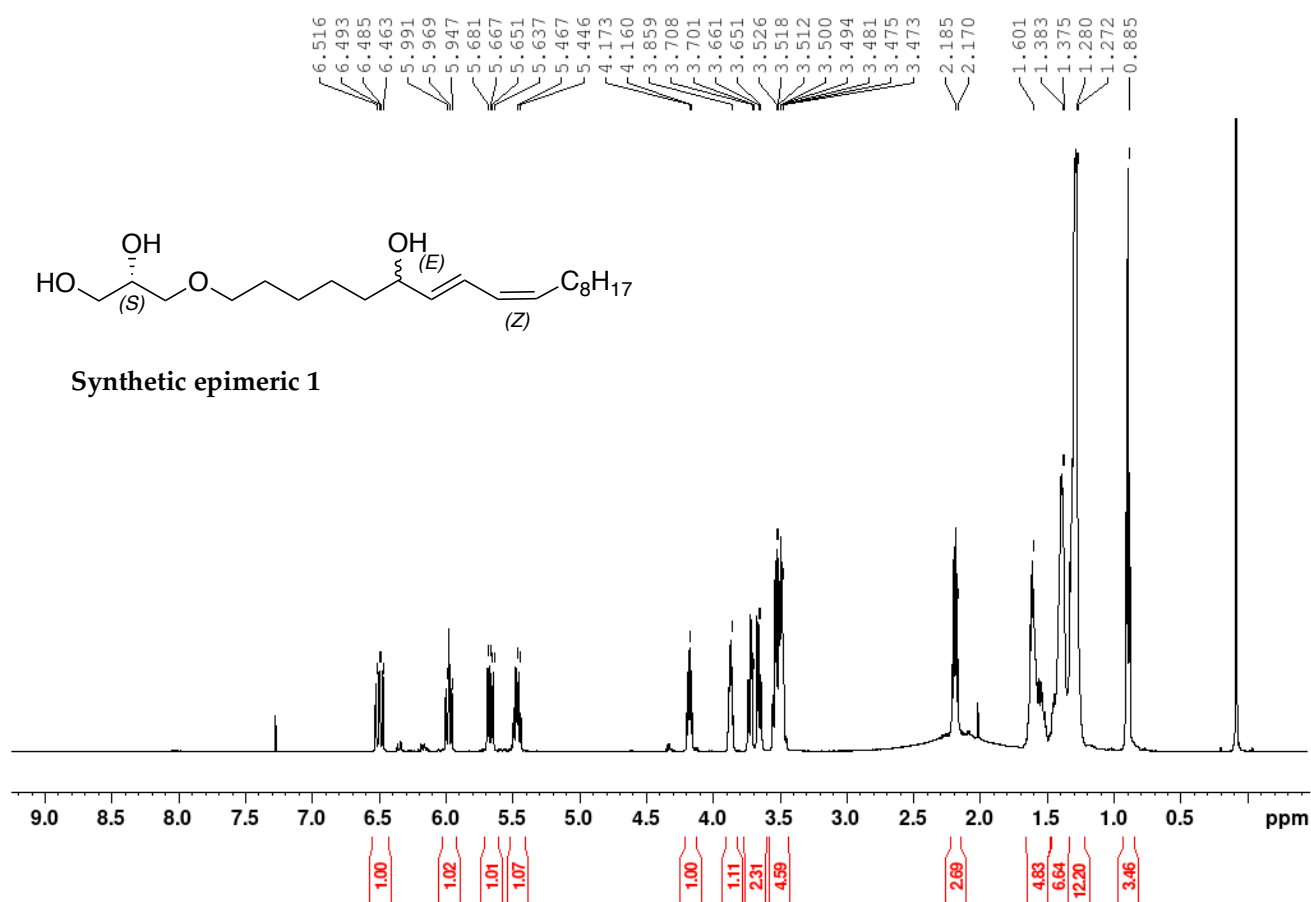

Figure S6:  $^{13}\text{C}$  NMR spectrum of synthetic pericharaxins A + B (**1a** + **1b**) (125 MHz,  $\text{CDCl}_3$ ).

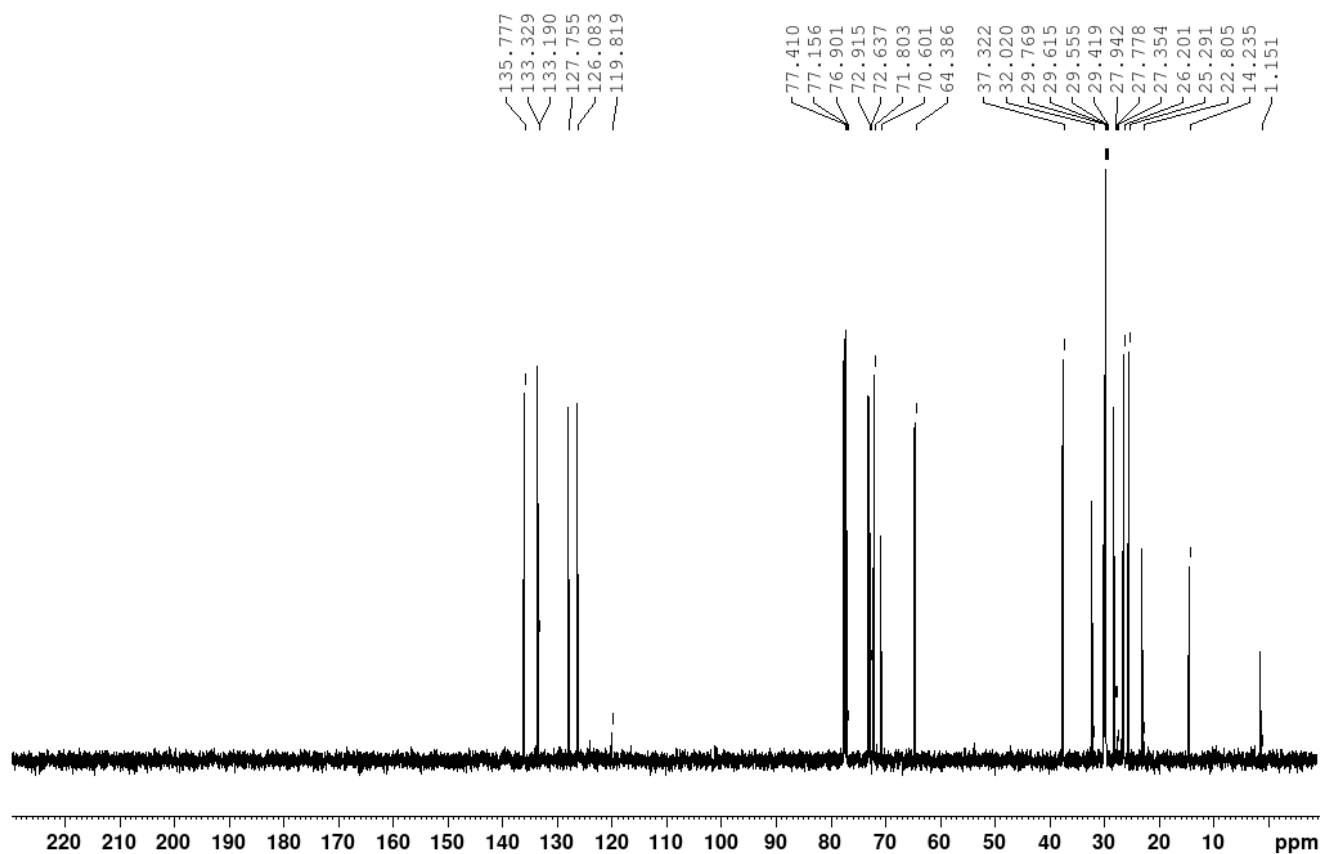

Figure S7:  $^1\text{H}$  NMR spectrum of synthetic pericharaxin (**1a**) (500 MHz,  $\text{CDCl}_3$ ).

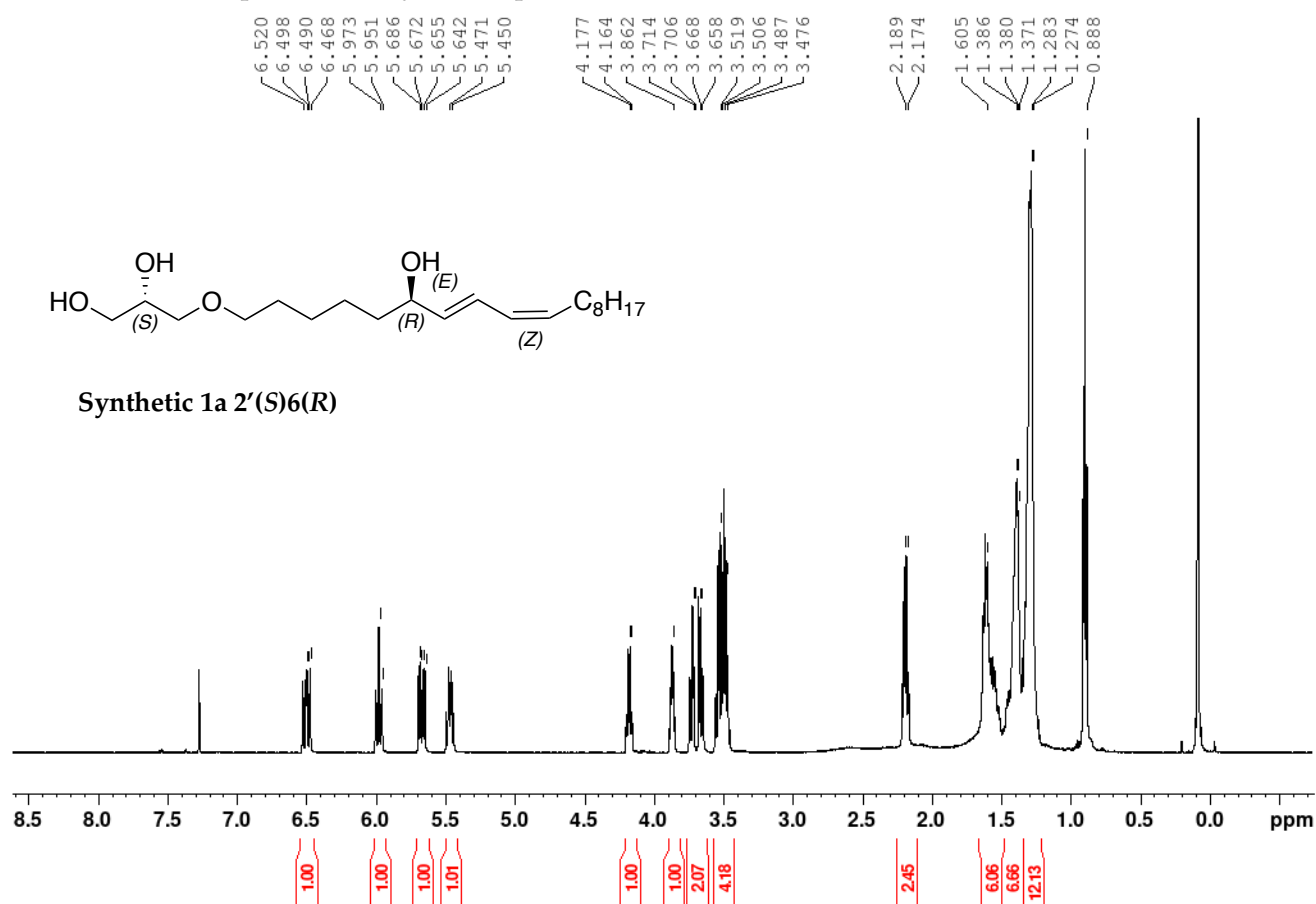

Figure S8:  $^{13}\text{C}$  NMR spectrum of synthetic pericharaxin (**1a**) (125 MHz,  $\text{CDCl}_3$ ).

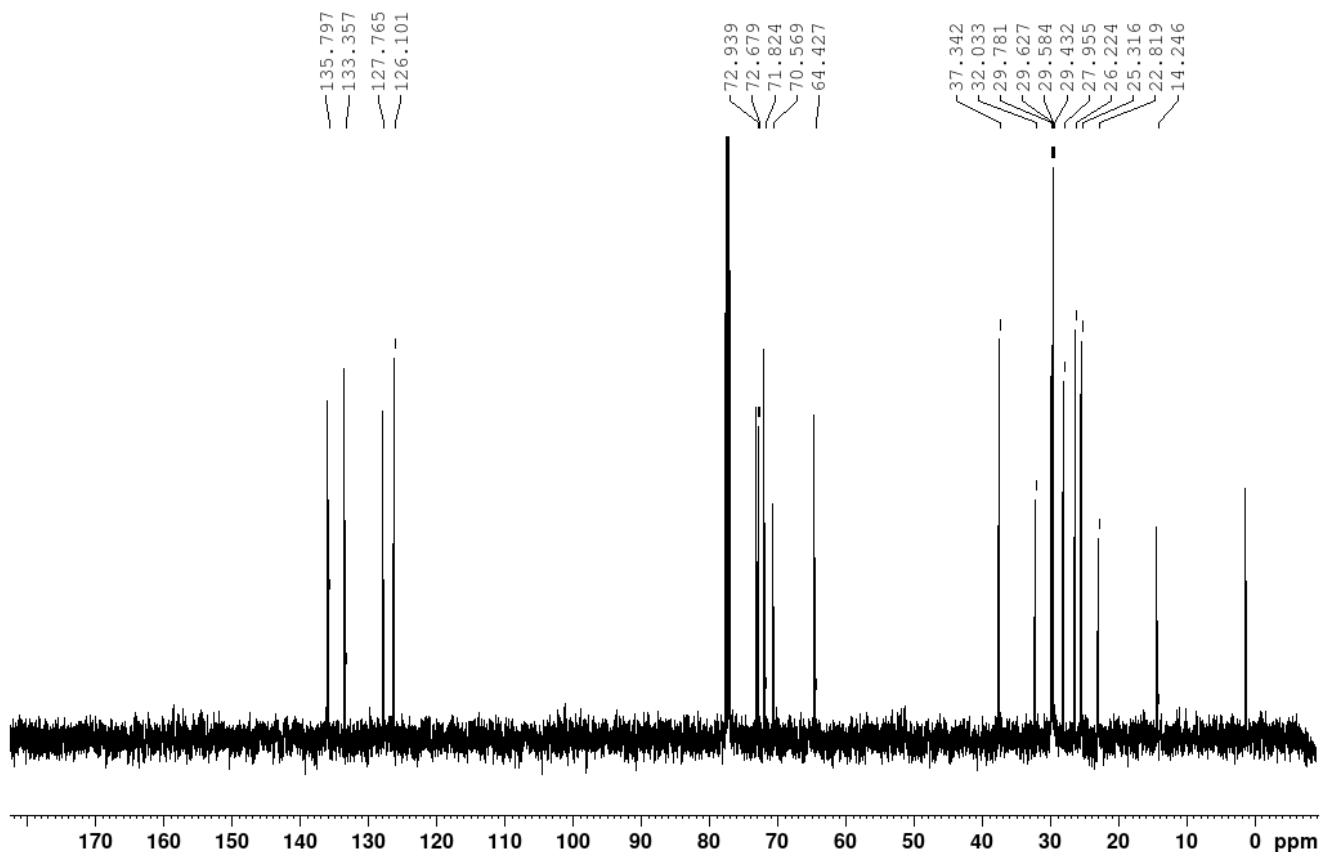



**Figure S9:**  $^1\text{H}$  NMR spectrum of synthetic pericharaxin (**1b**) (500 MHz,  $\text{CDCl}_3$ ).

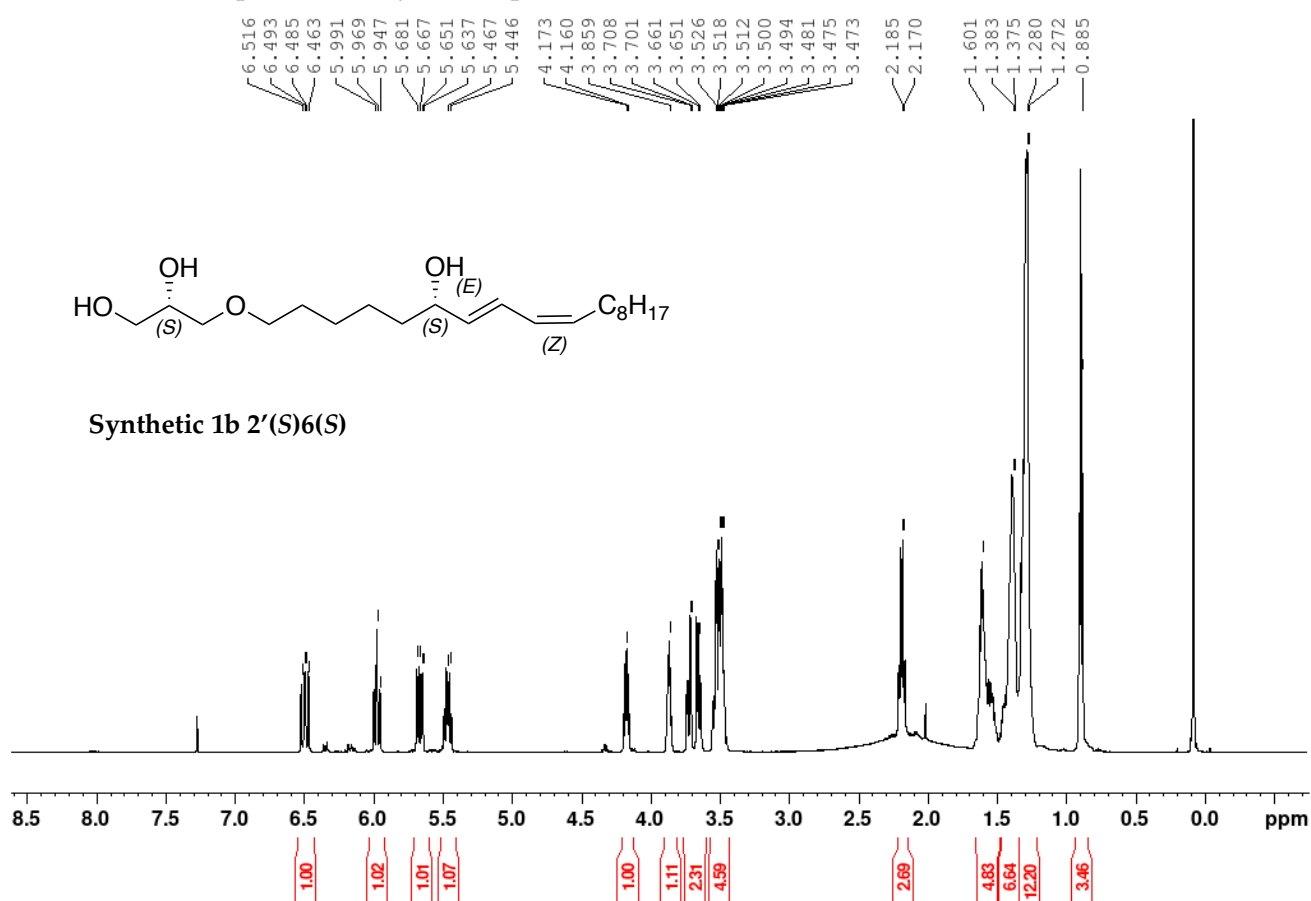

**Figure S10:**  $^{13}\text{C}$  NMR spectrum of synthetic pericharaxin (**1b**) (125 MHz,  $\text{CDCl}_3$ ).

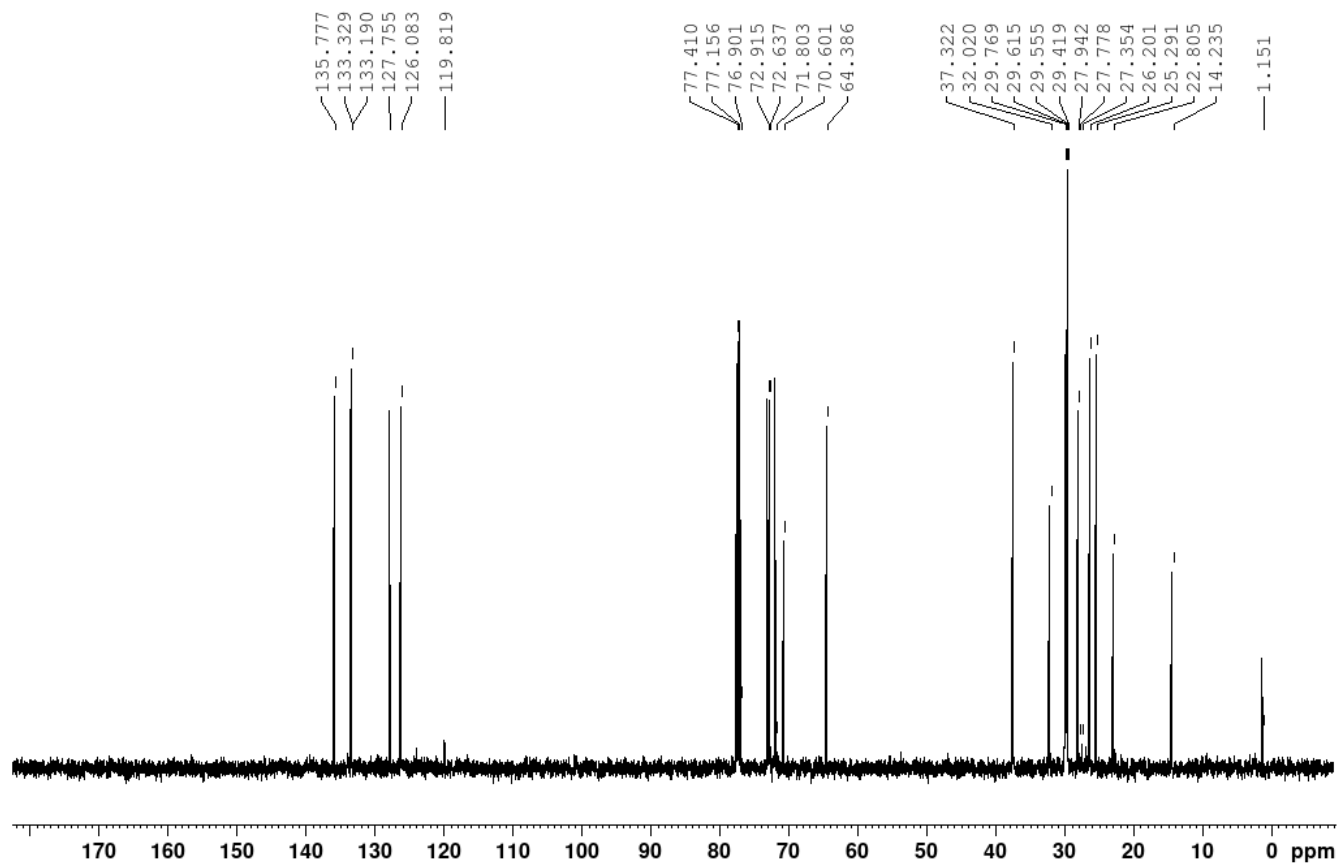

**Figure S11:** Chiral HPLC chromatograms of natural and synthetic compounds comparison

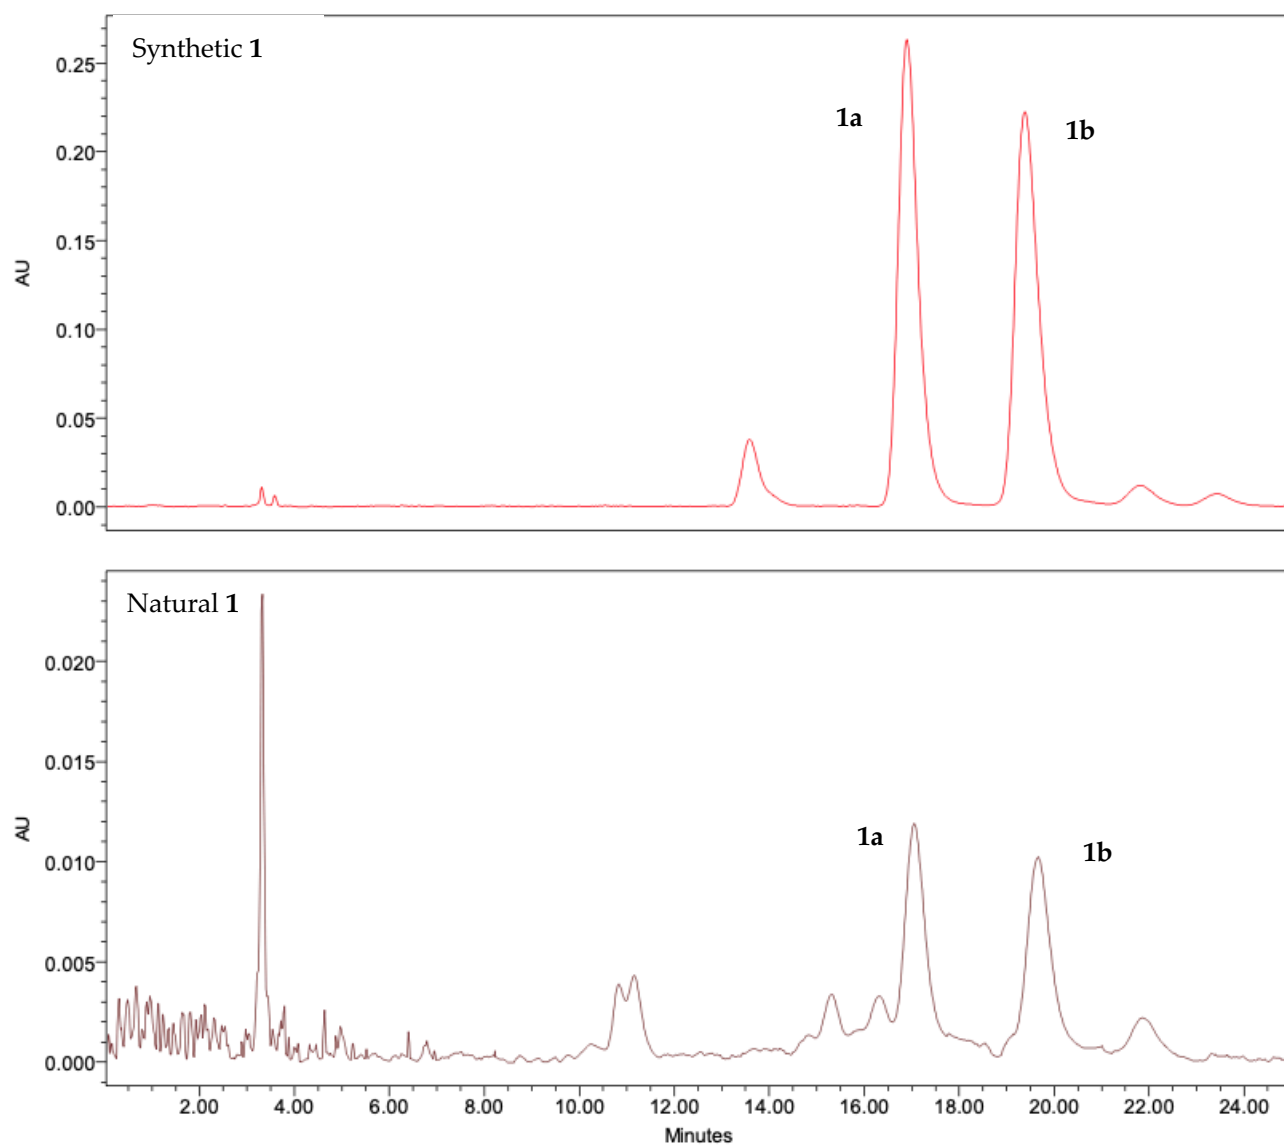

**Condition:**

Column: CHIRALPAK ID 5 $\mu$ M (4.6x250 mm)

Detection: PDA Max Plot

Solvent: isocratic, heptane/isopropanol 8:2

**Figure S12:**  $^1\text{H}$  NMR spectrum of compound **4** (500 MHz,  $\text{CDCl}_3$ ).

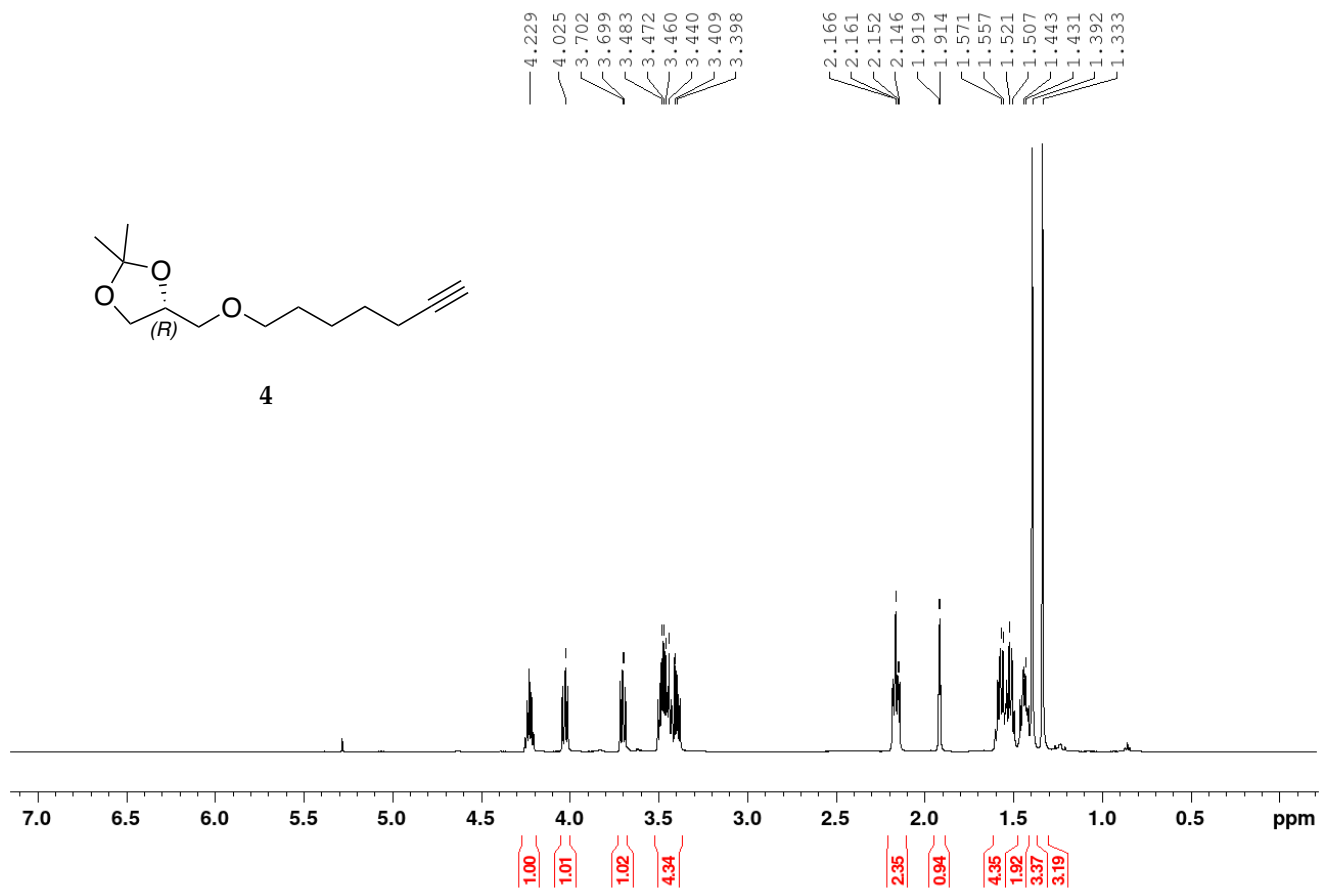

**Figure S13:**  $^{13}\text{C}$  NMR spectrum of compound **4** (125 MHz,  $\text{CDCl}_3$ ).

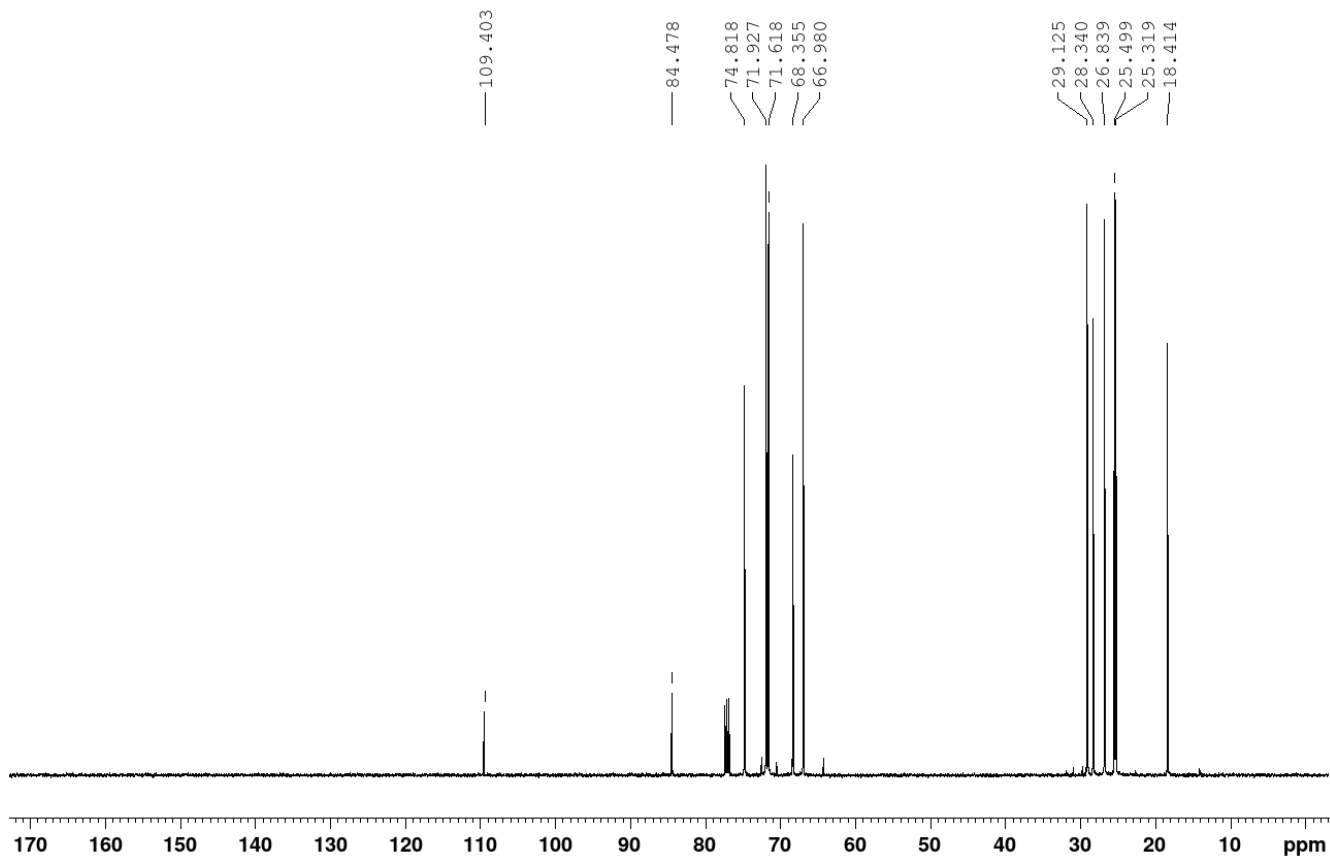

**Figure S14:**  $^1\text{H}$  NMR spectrum of compound **5** (500 MHz,  $\text{CDCl}_3$ ).

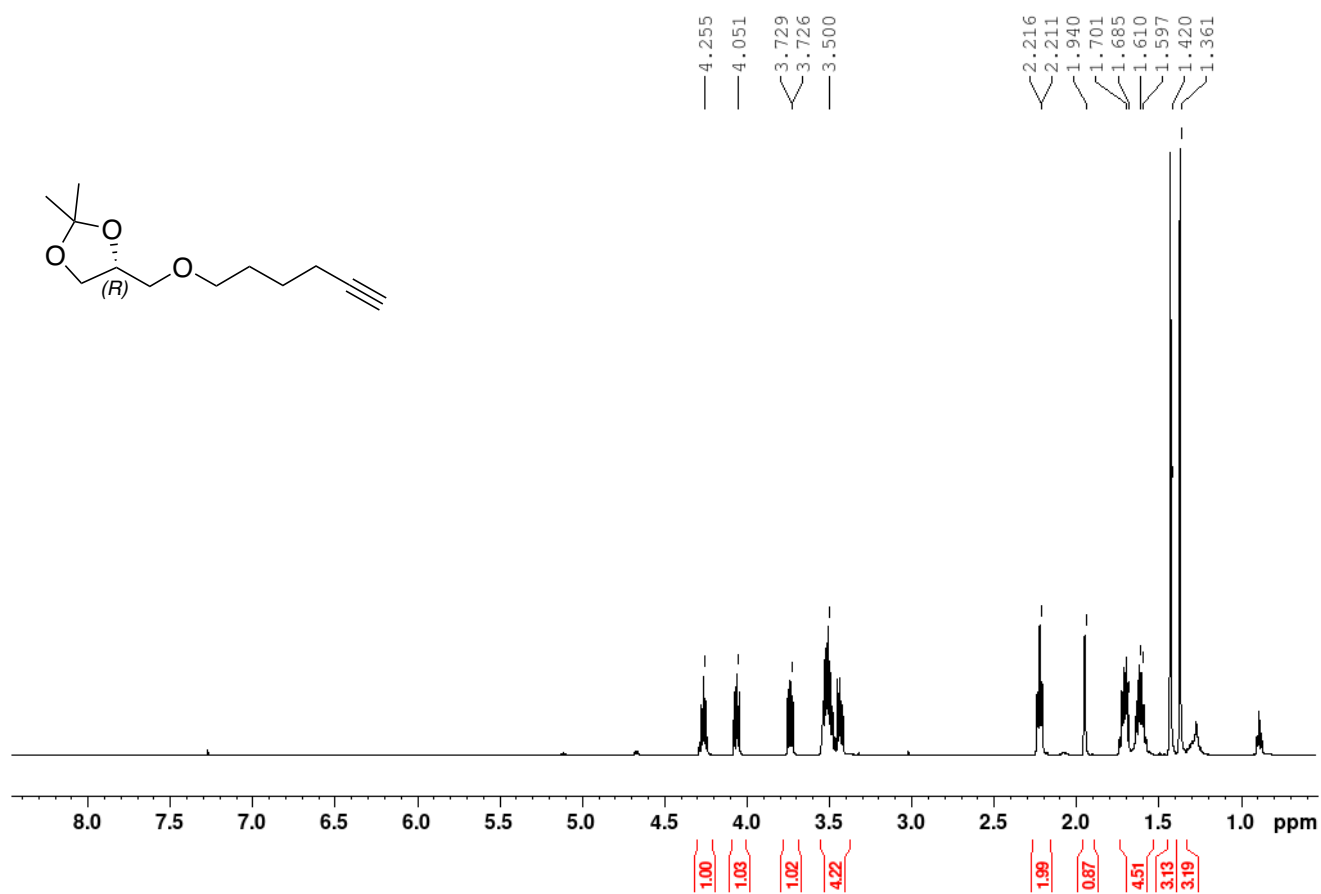

**Figure S15:**  $^1\text{H}$  NMR spectrum of compound **6** (500 MHz,  $\text{CDCl}_3$ ).

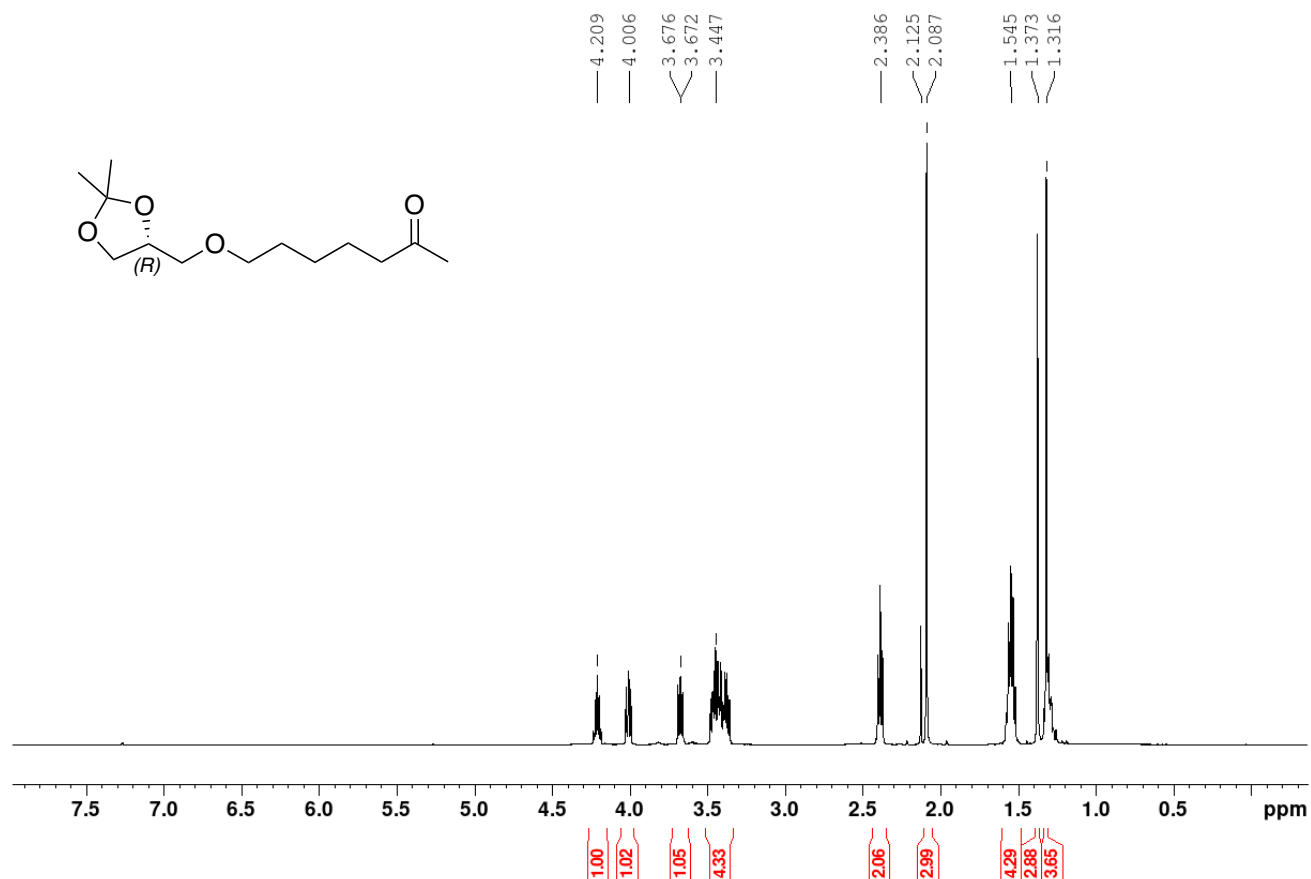

**Figure S16:**  $^{13}\text{C}$  NMR spectrum of compound **6** (125 MHz,  $\text{CDCl}_3$ ).

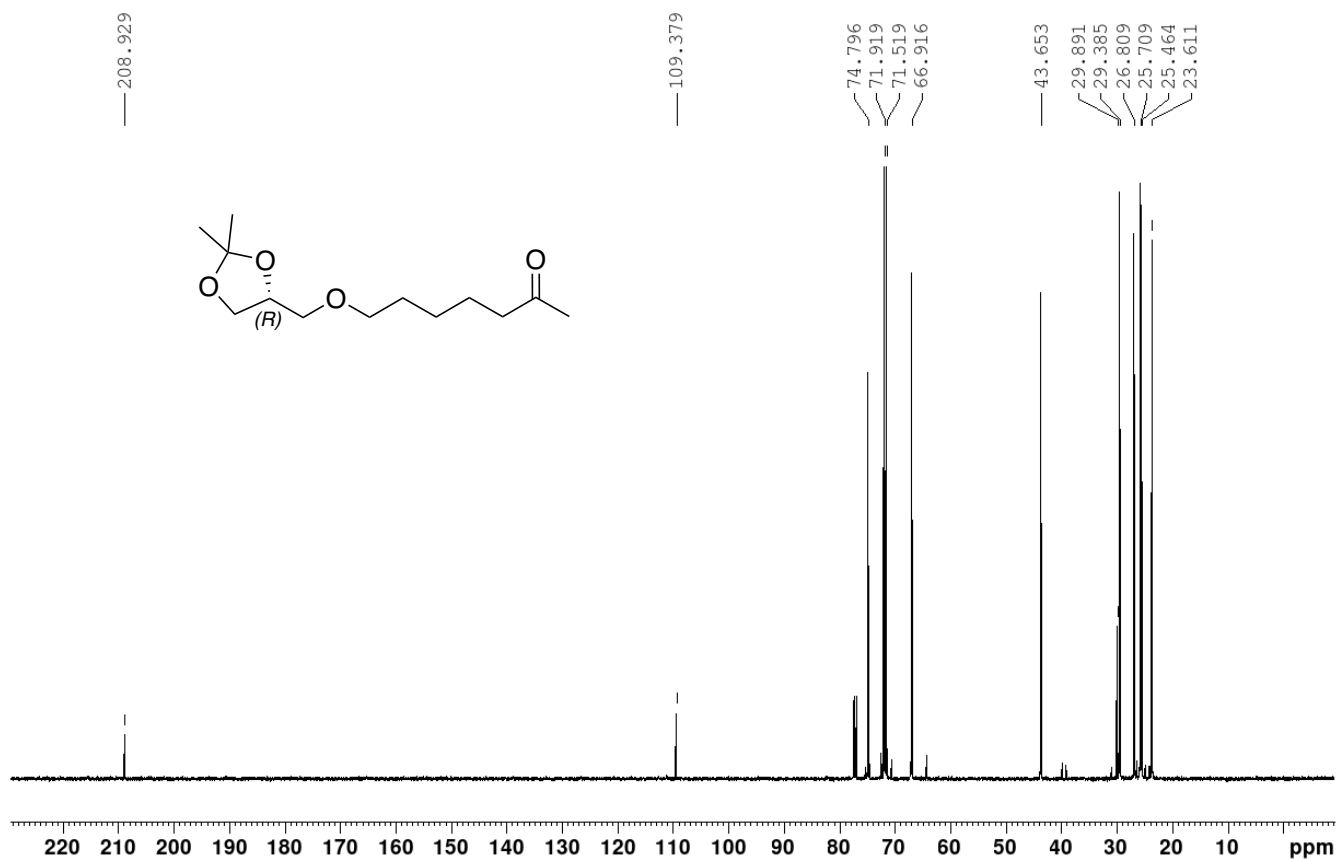

**Figure S17:**  $^1\text{H}$  NMR spectrum of compound 7 (500 MHz,  $\text{CDCl}_3$ ).

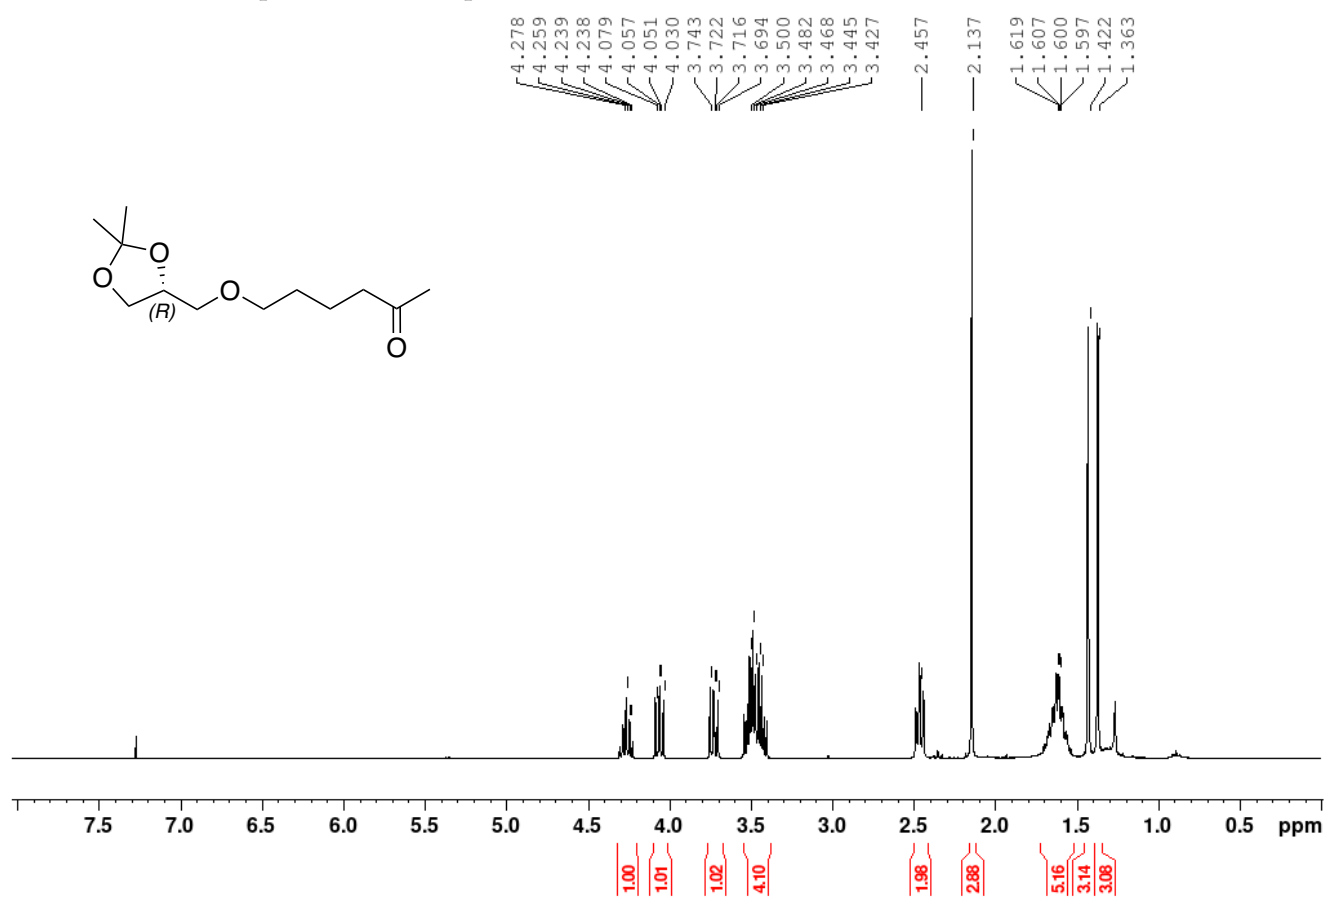

**Figure S18:**  $^{13}\text{C}$  NMR spectrum of compound 7 (125 MHz,  $\text{CDCl}_3$ ).

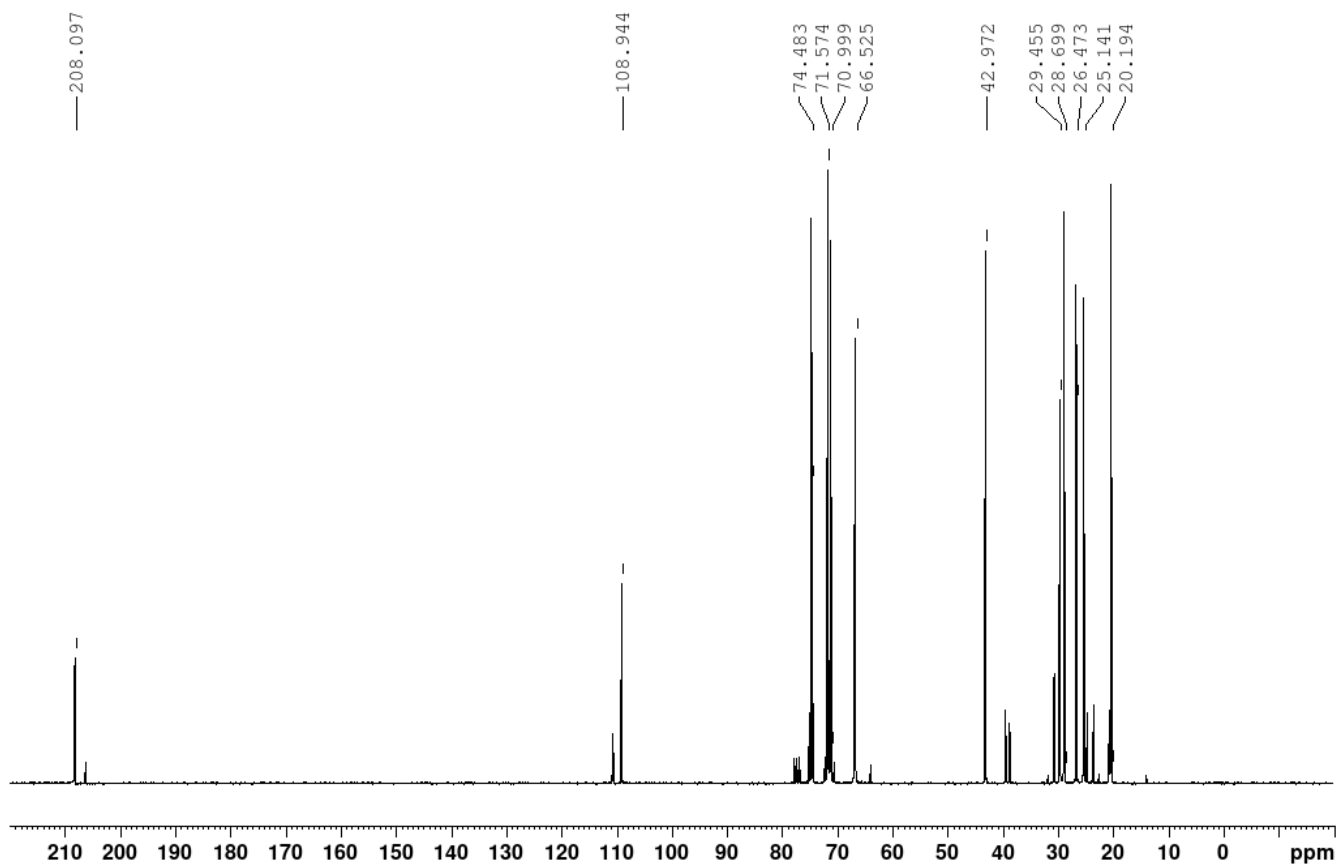

**Figure S19:**  $^1\text{H}$  NMR spectrum of compound **11** (300 MHz,  $\text{CDCl}_3$ ).

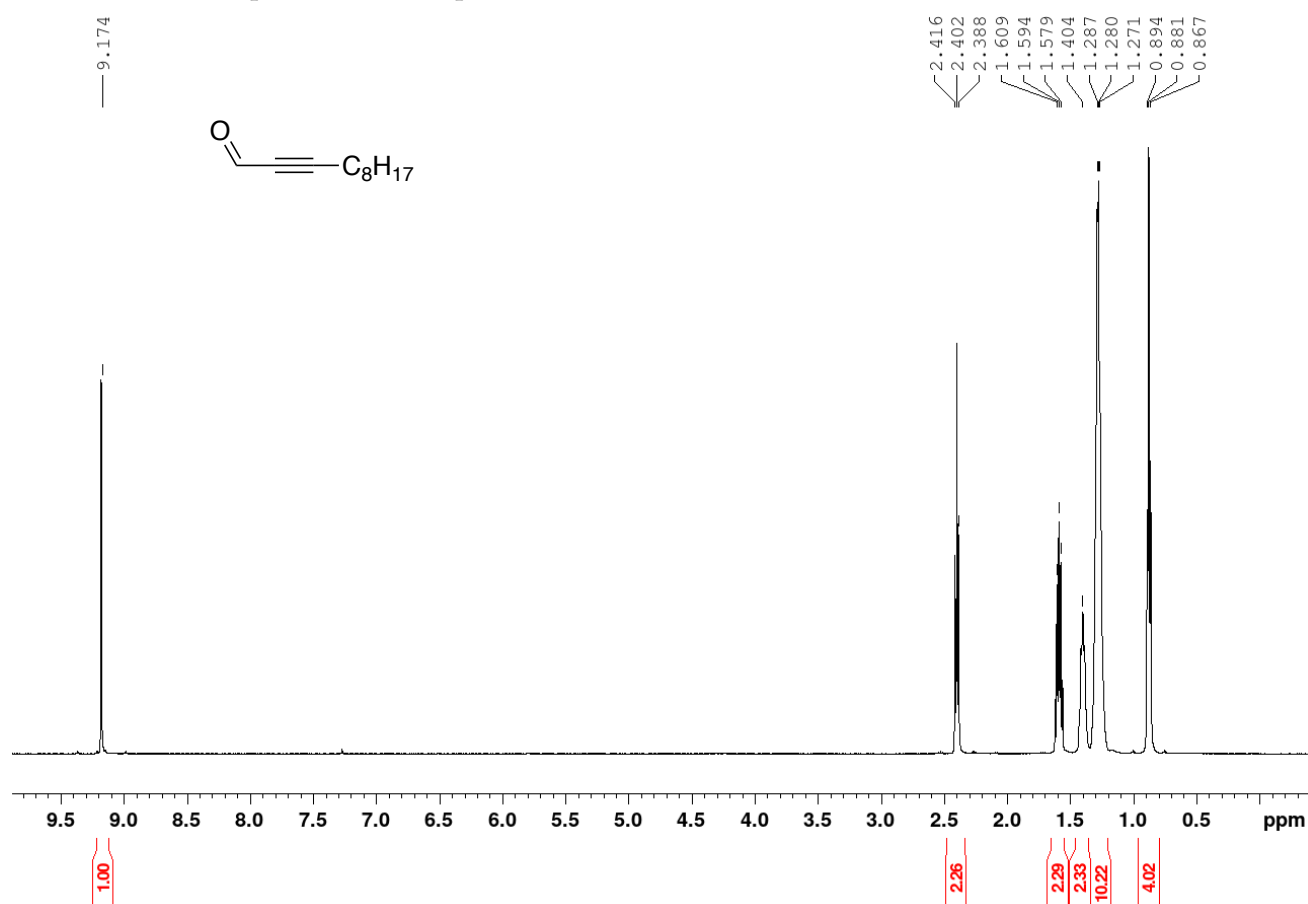

**Figure S20:**  $^{13}\text{C}$  NMR spectrum of compound **11** (75 MHz,  $\text{CDCl}_3$ ).

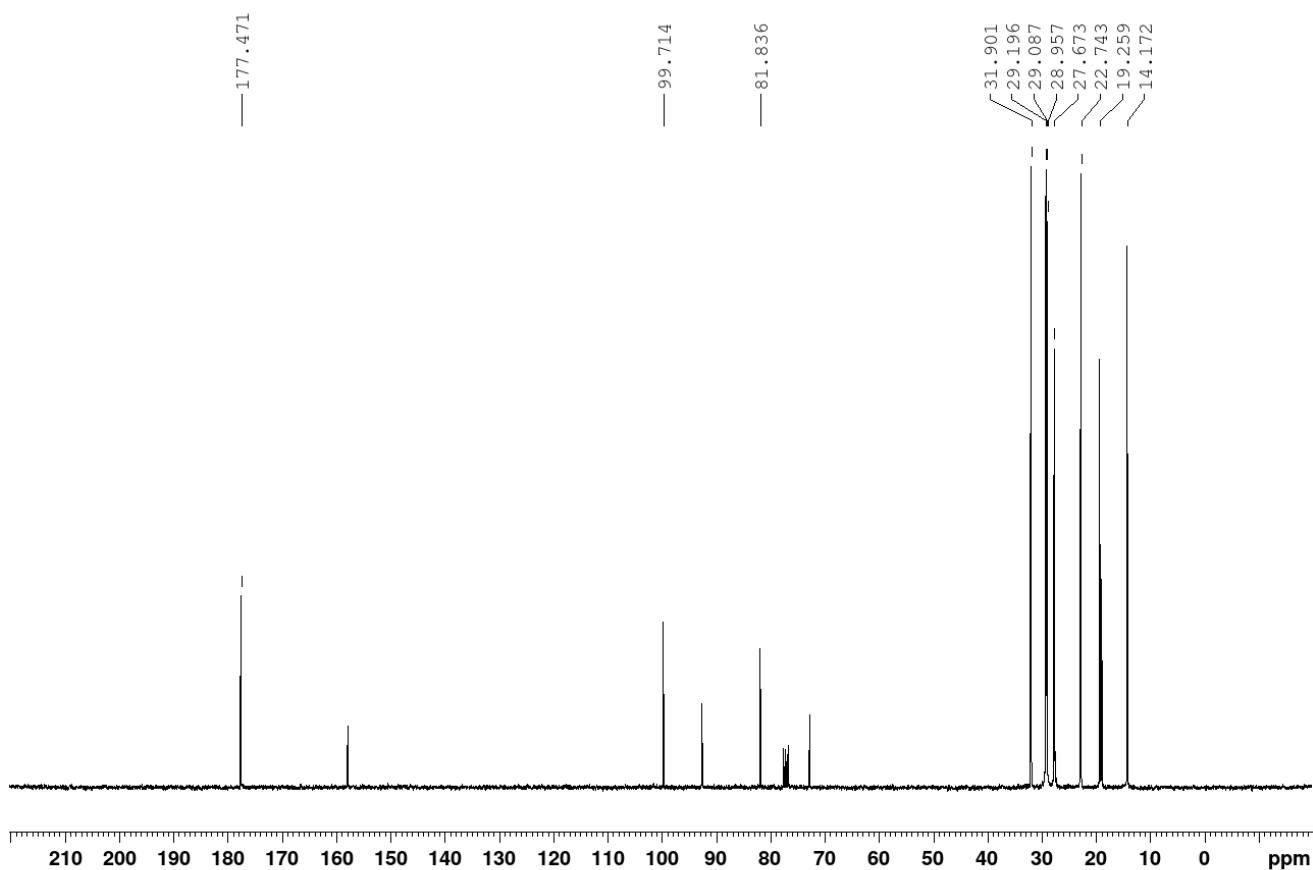

**Figure S21:**  $^1\text{H}$  NMR spectrum of compound **12** (500 MHz,  $\text{CDCl}_3$ ).

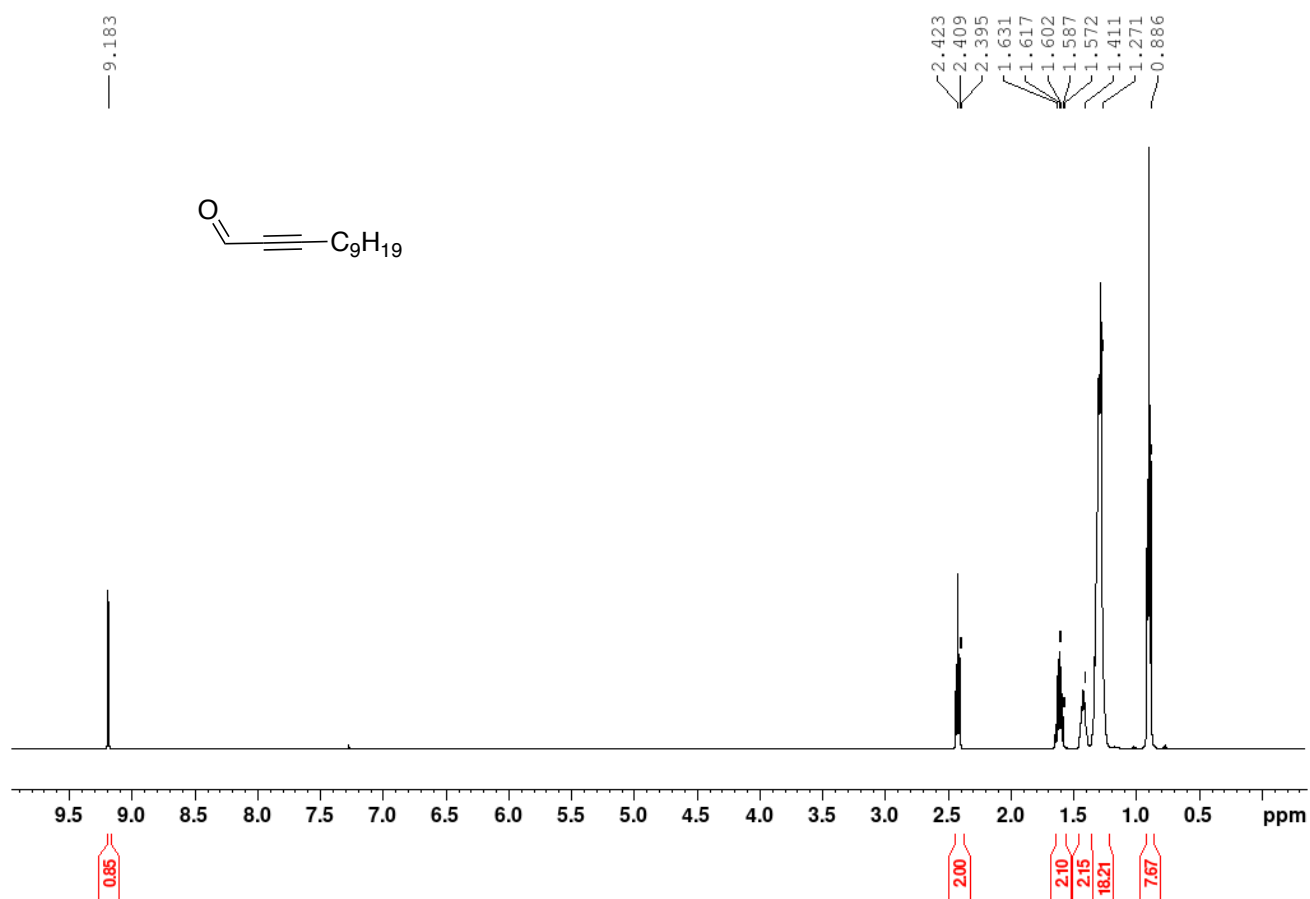

**Figure S22:**  $^{13}\text{C}$  NMR spectrum of compound **12** (125 MHz,  $\text{CDCl}_3$ ).

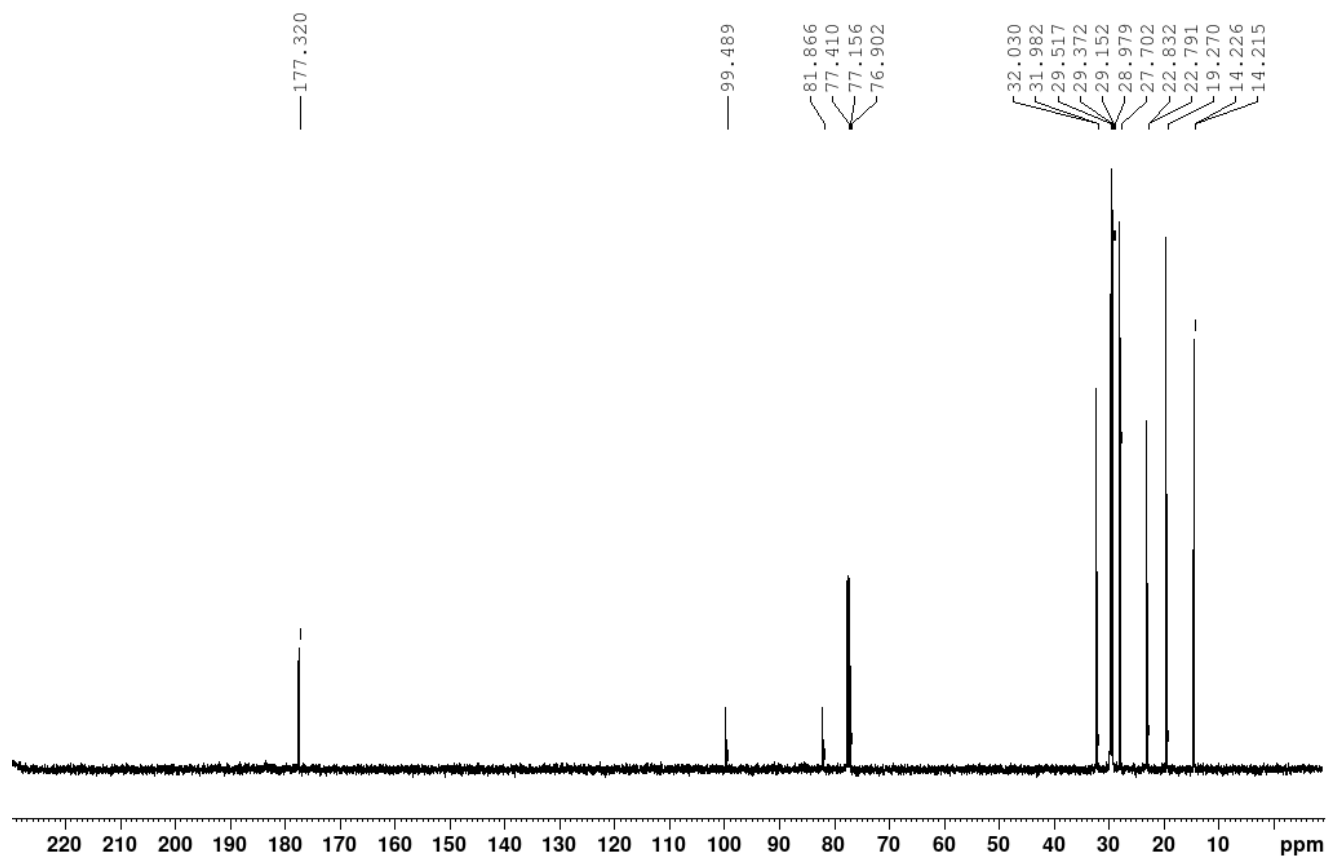



Figure S23:  $^1\text{H}$  NMR spectrum of compound **13** (300 MHz,  $\text{CDCl}_3$ ).

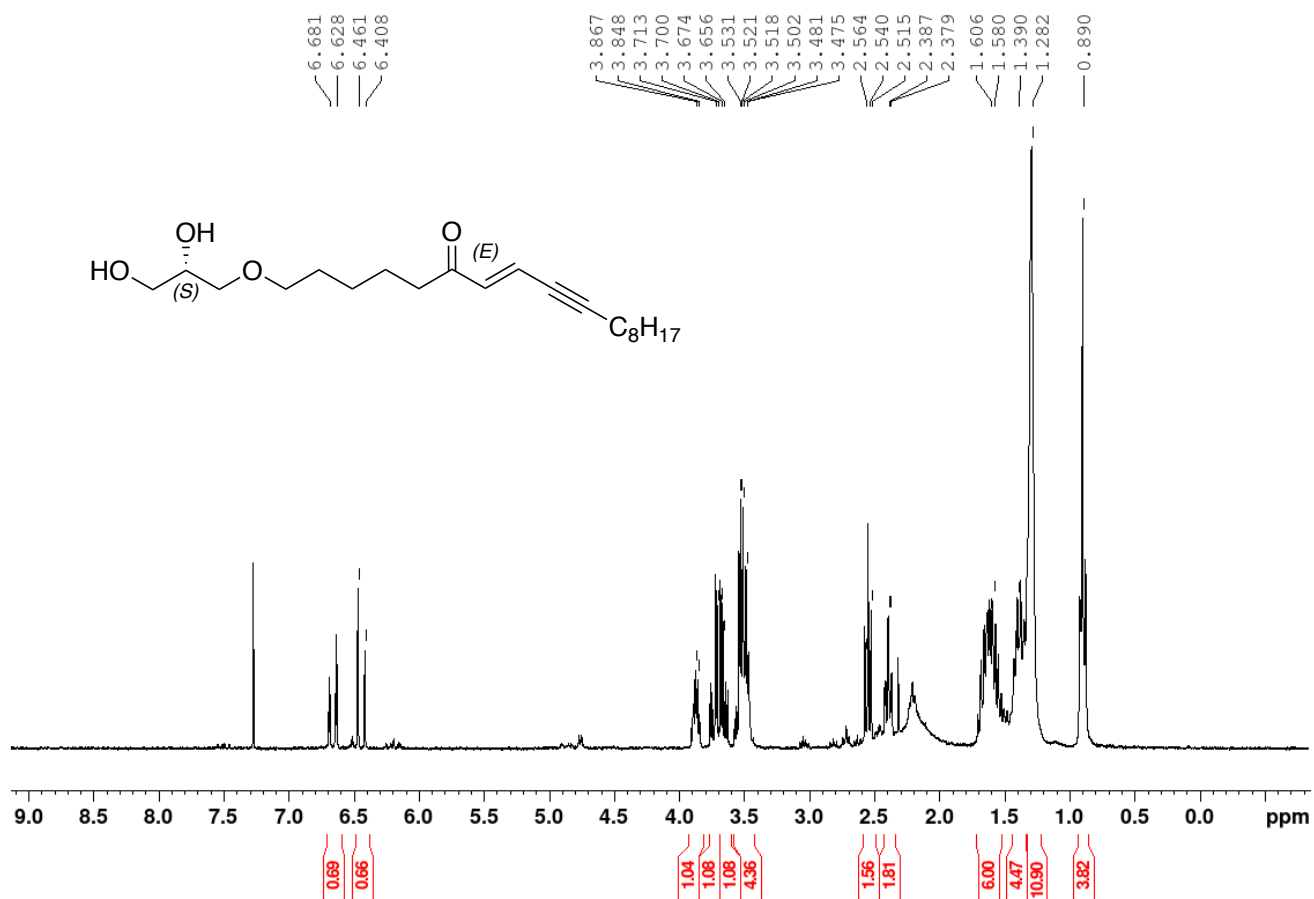

Figure S24:  $^{13}\text{C}$  NMR spectrum of compound **13** (75 MHz,  $\text{CDCl}_3$ ).

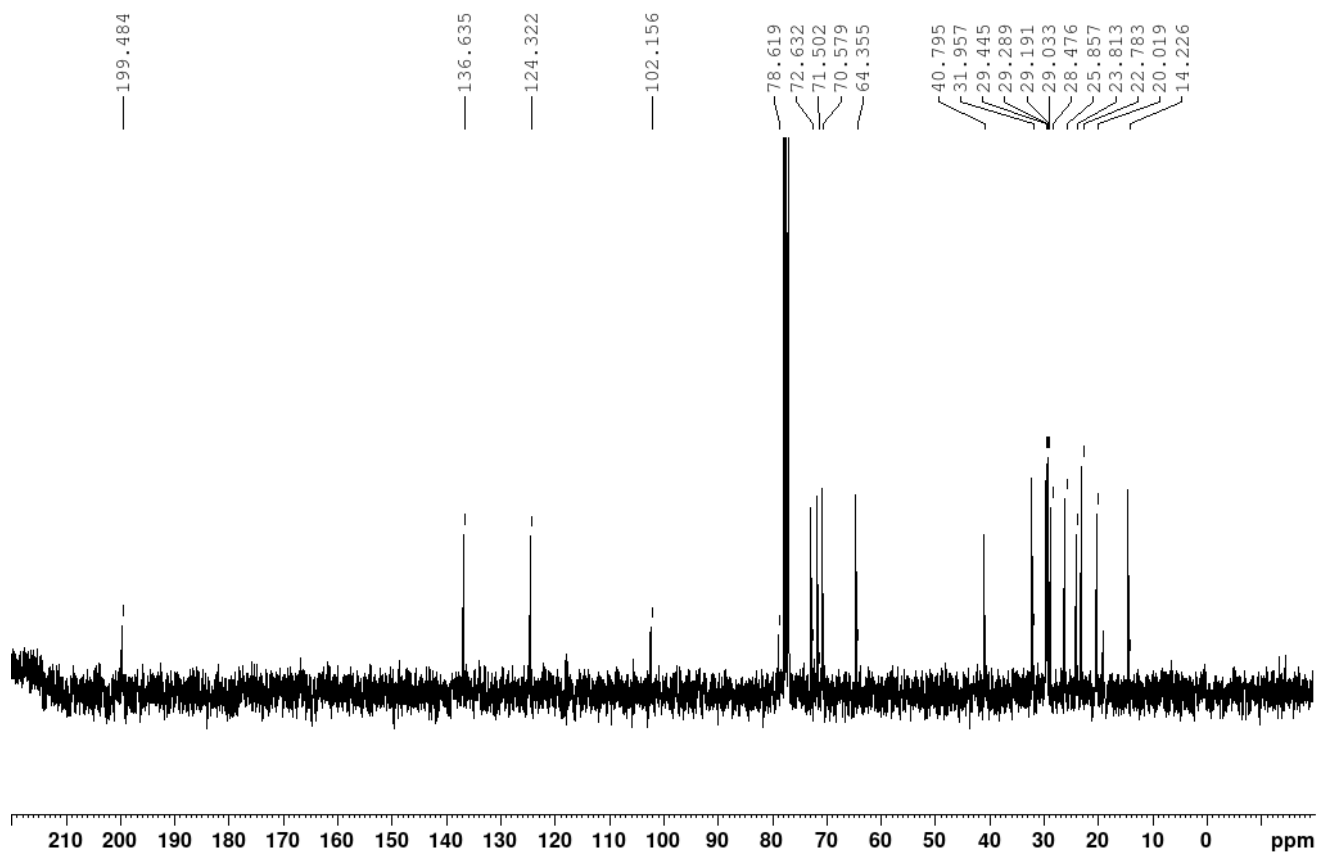

Figure S25:  $^1\text{H}$  NMR spectrum of compound **14'** (500 MHz,  $\text{CDCl}_3$ ).

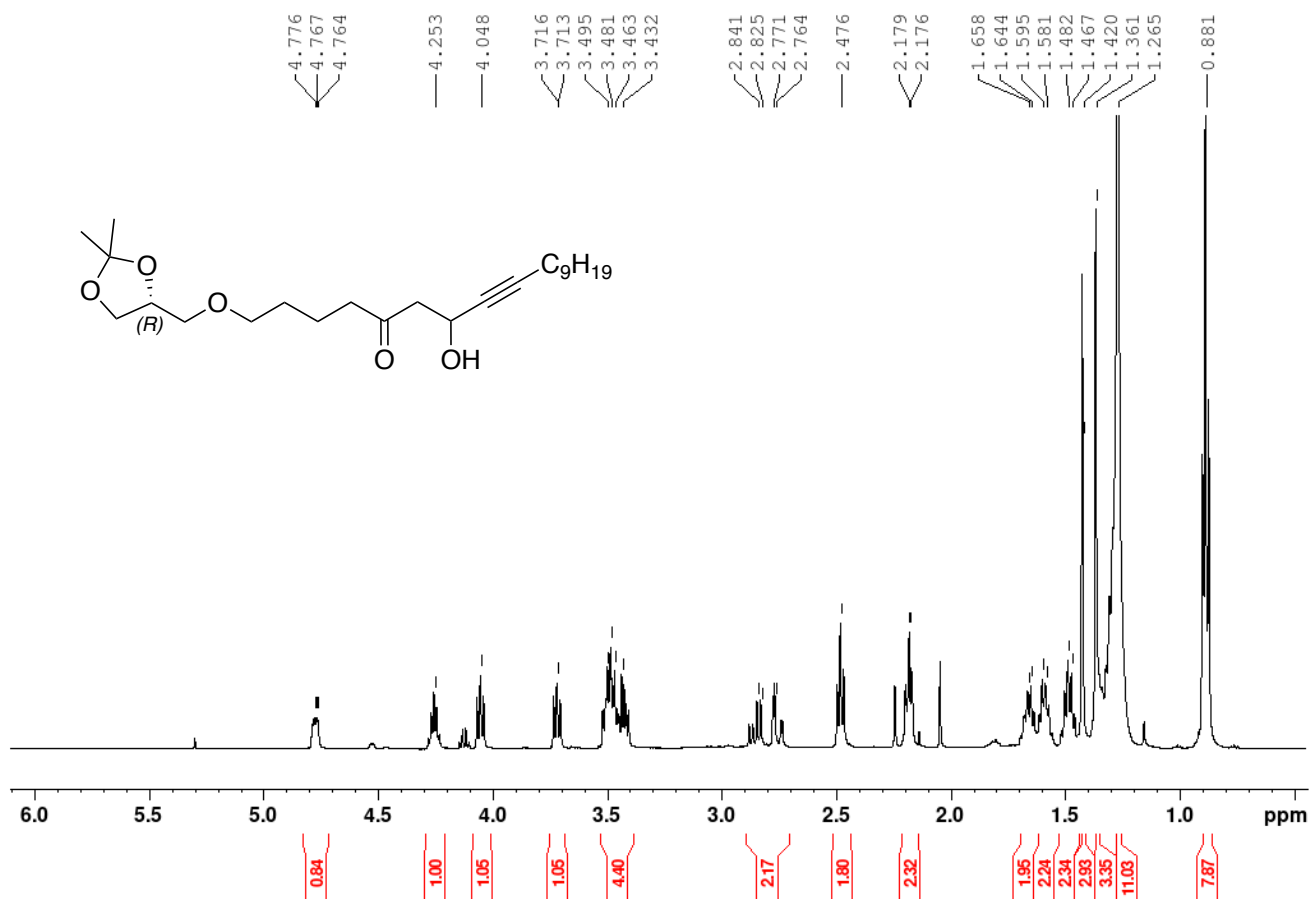

Figure S26:  $^{13}\text{C}$  NMR spectrum of compound **14'** (125 MHz,  $\text{CDCl}_3$ ).

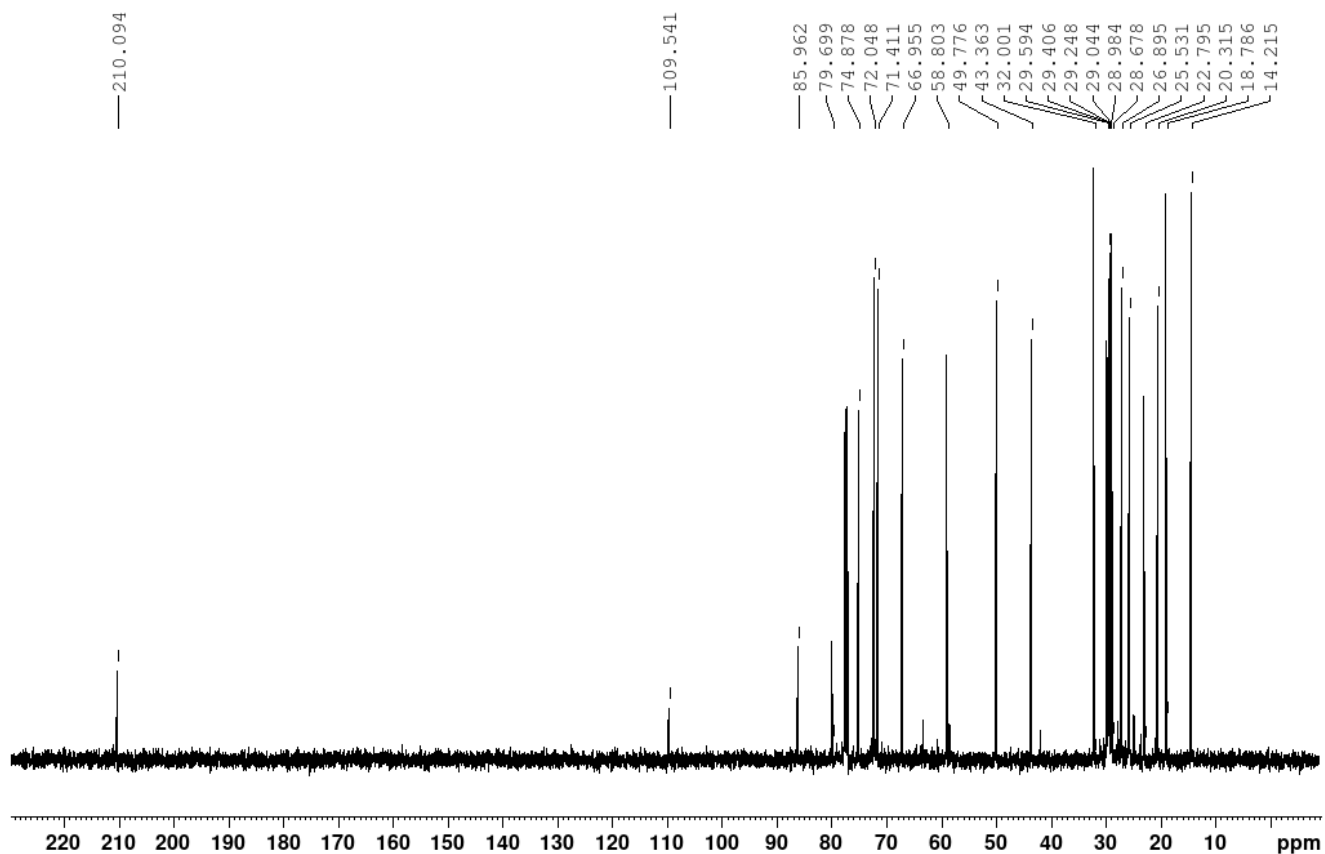

Figure S27:  $^1\text{H}$  NMR spectrum of compound **14** (500 MHz,  $\text{CDCl}_3$ ).

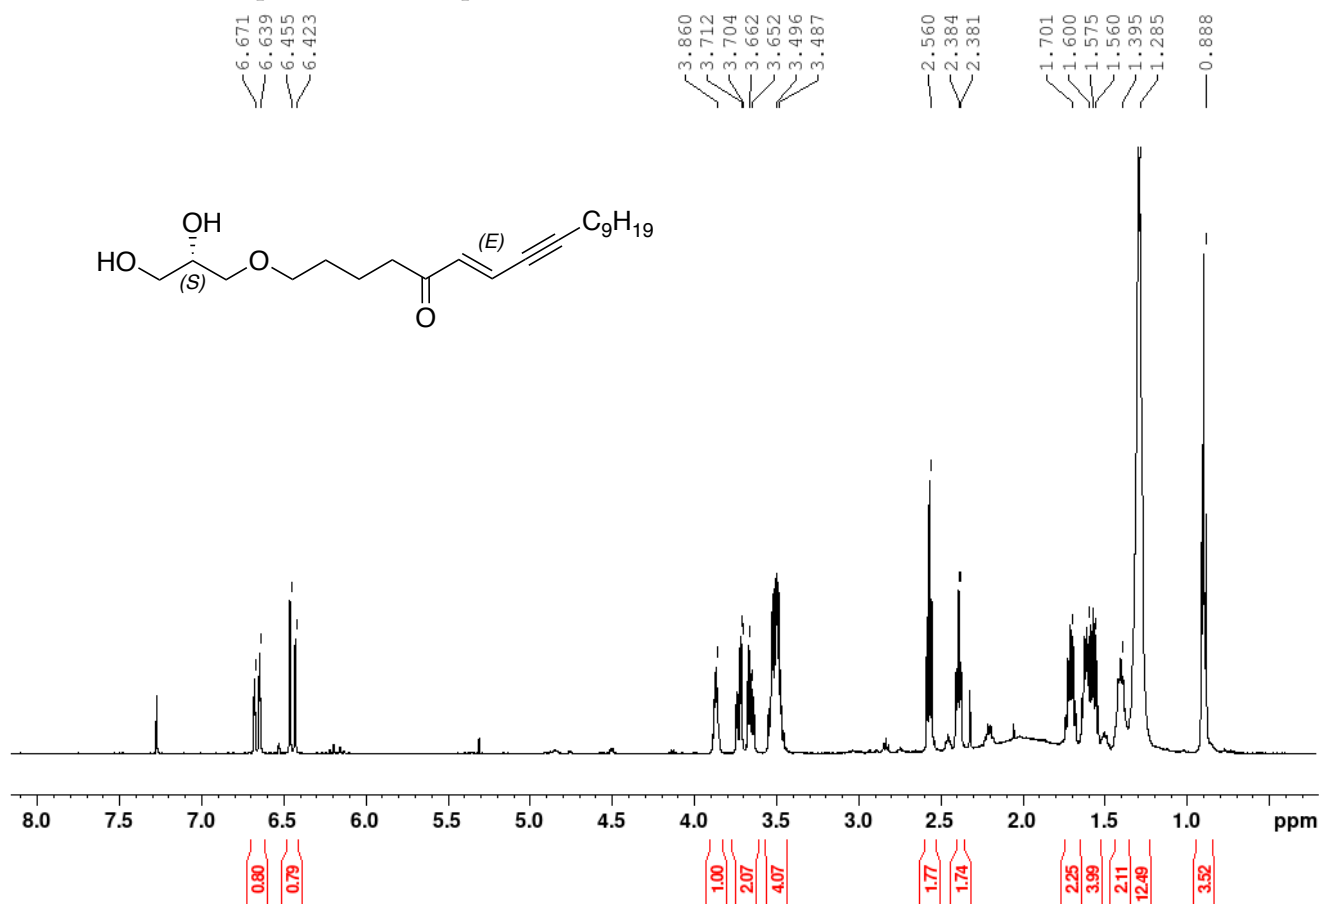

Figure S28:  $^{13}\text{C}$  NMR spectrum of compound **14** (125 MHz,  $\text{CDCl}_3$ ).

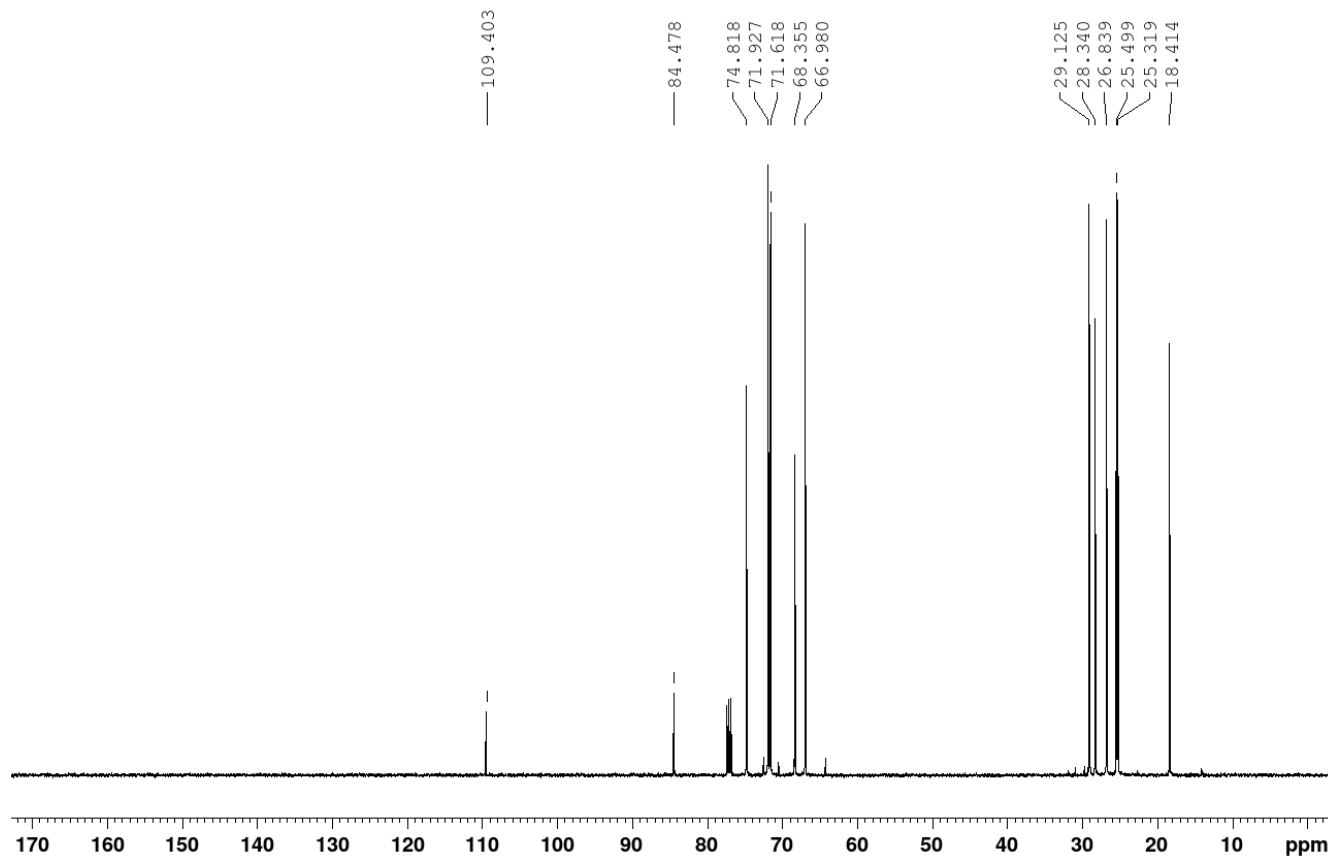

Figure S29: NMR comparisons of natural product with the two synthetic products

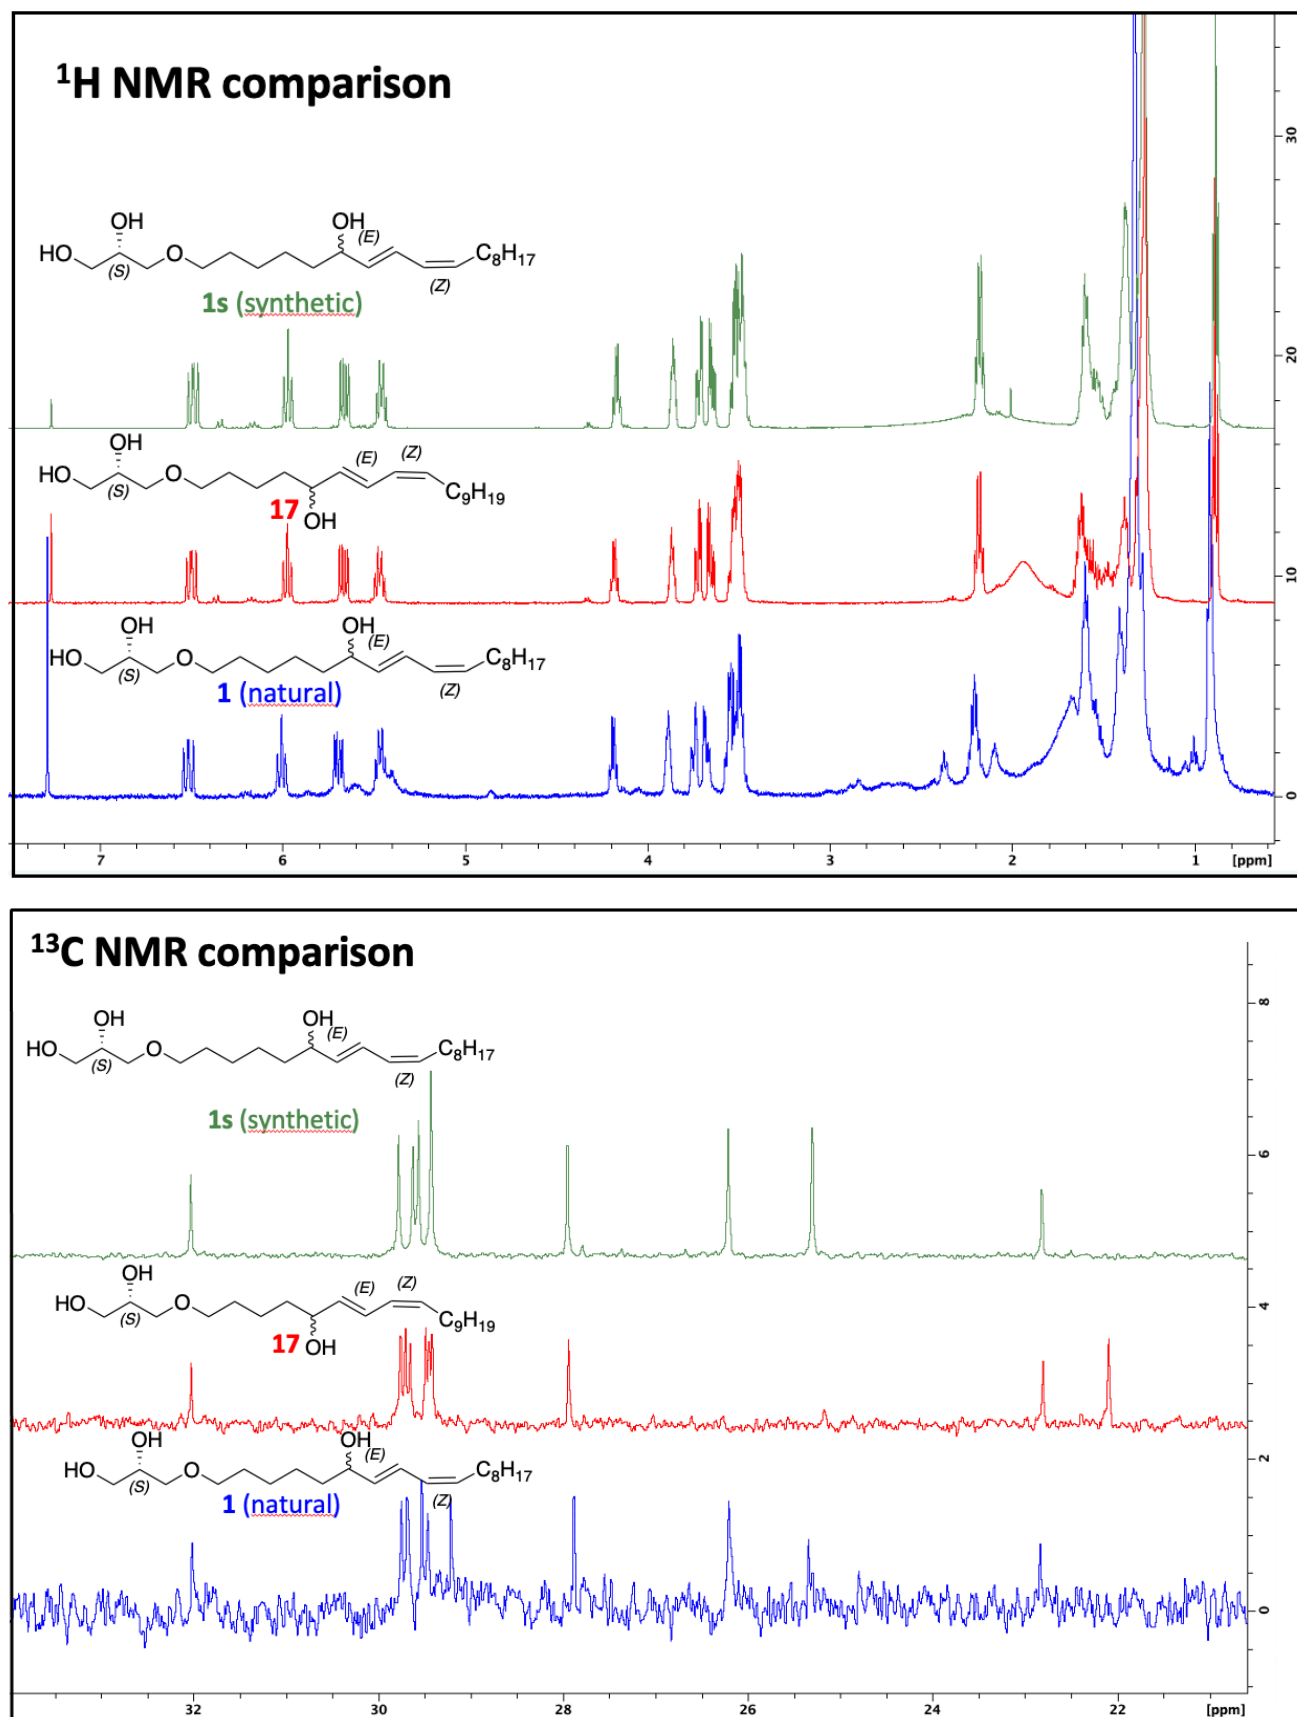

**Figure S30:**  $^{13}\text{C}$  NMR comparison of epimers **1a** (*S,R*) and **1b** (*S,S*)

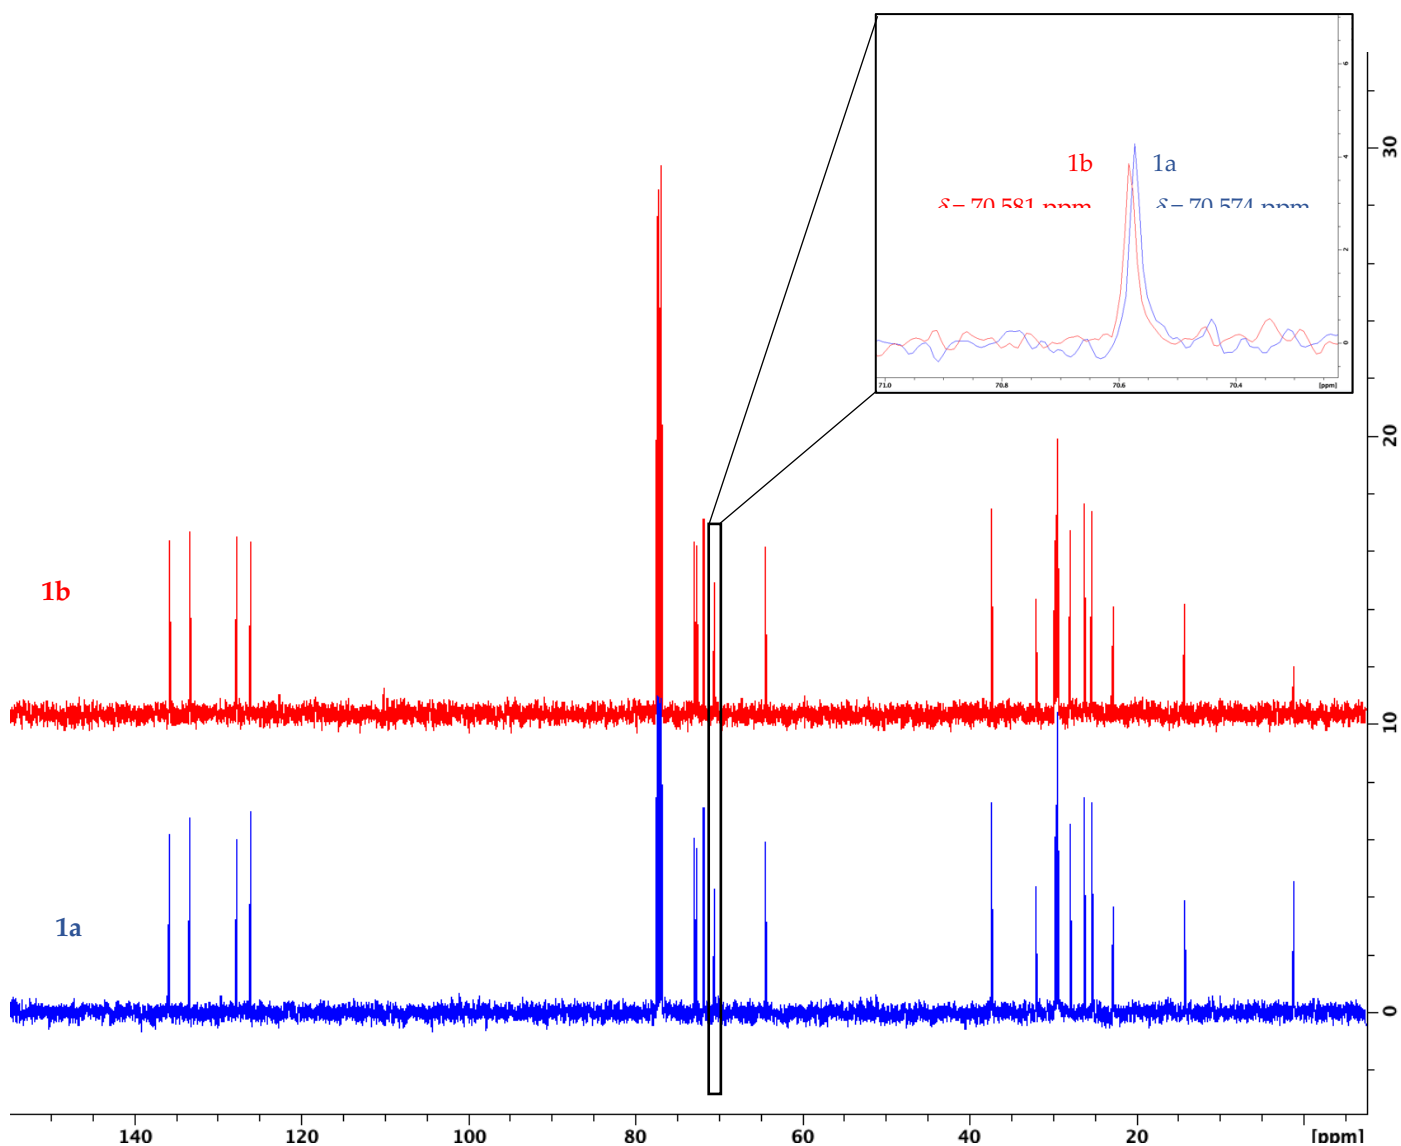

**Figure S31:** results of the assessment of an ATDC5-based rapid screening platform using the human Col X (hCol X) proximal promoter activity for selection of natural compounds able to stimulate endochondral differentiation. hColX-promoter activity in murine ATDC5 chondrocyte line cultured under endochondral differentiation conditions as assessed by measurement of luminescent luciferase signals.

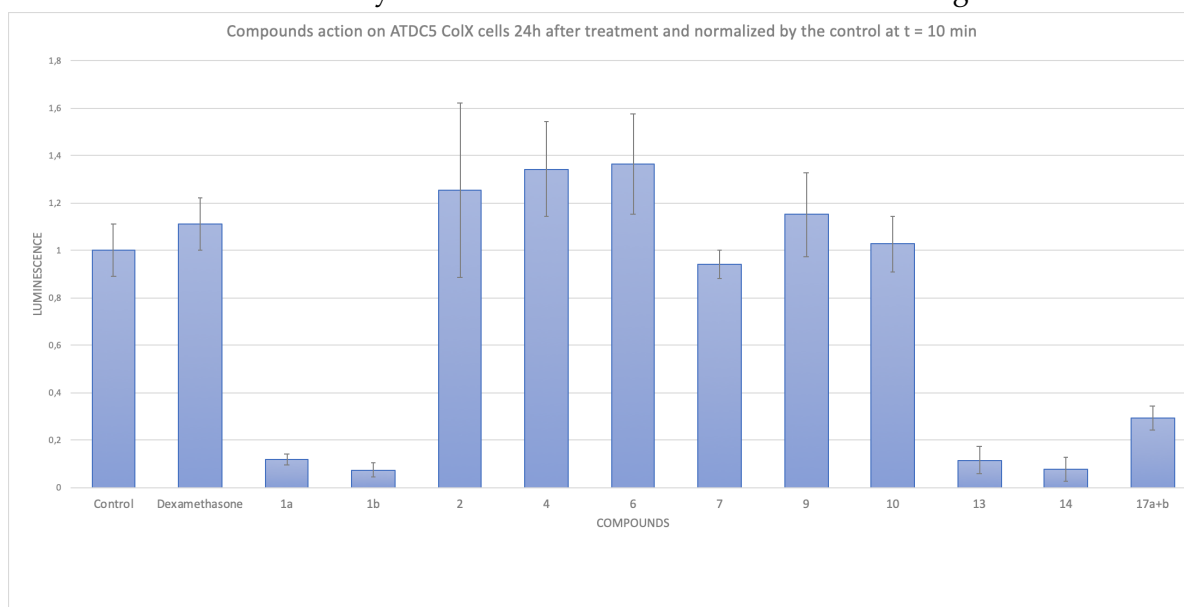

Supplement: s1 [file s1]
